1 **Tet-dependent 5-hydroxymethyl-Cytosine modification of**  
2 **mRNA regulates axon guidance genes in *Drosophila***

3  
4 Badri Nath Singh<sup>1,#</sup>, Hiep Tran<sup>1,#</sup>, Joseph Kramer<sup>3</sup>, Elmira Kirichenko<sup>1</sup>, Neha Changela<sup>1</sup>, Fei  
5 Wang<sup>1</sup>, Yaping Feng<sup>1</sup>, Dibyendu Kumar<sup>1</sup>, Min Tu<sup>1</sup>, Jie Lan<sup>4,5</sup>, Martin Bizet<sup>4</sup>, François Fuks<sup>4</sup>, and  
6 Ruth Steward<sup>1,2,\*</sup>

7  
8 <sup>1</sup> Waksman Institute, Rutgers University, Piscataway, NJ 08854

9 <sup>2</sup> Department of Molecular Biology and Biochemistry, Cancer Institute of New Jersey, Rutgers  
10 University

11 <sup>3</sup> Department of Pathology and Laboratory Medicine, Rutgers Biomedical and Health Sciences,  
12 Rutgers University, New Brunswick

13 <sup>4</sup> Laboratory of Cancer Epigenetics, Faculty of Medicine, ULB Cancer Research Center (U-  
14 CRC), Université Libre de Bruxelles (ULB), Brussels, Belgium

15 <sup>5</sup> Present address, Institute for Genetics, Justus-Liebig University Giessen, 35392 Giessen,  
16 Germany

17  
18 \* Corresponding author

19 E-mail: [steward@waksman.rutgers.edu](mailto:steward@waksman.rutgers.edu)

20  
21 # These authors contributed equally to this work.

22

23

## 24 **Abstract**

25 Modifications of mRNA, especially methylation of adenosine, have recently drawn much  
26 attention. The much rarer modification, 5-hydroxymethylation of cytosine (5hmC), is not well  
27 understood and is the subject of this study. Vertebrate Tet proteins are 5-methylcytosine (5mC)  
28 hydroxylases and catalyze the transition of 5mC to 5hmC in DNA. These enzymes have  
29 recently been shown to have the same function in messenger RNAs in both vertebrates and in  
30 *Drosophila*. The *Tet* gene is essential in *Drosophila* as Tet knock-out animals do not reach  
31 adulthood. We describe the identification of Tet-target genes in the embryo and larval brain by  
32 mapping one, Tet DNA-binding sites throughout the genome and two, the Tet-dependent 5hmC  
33 modifications transcriptome-wide. 5hmC modifications are distributed along the entire  
34 transcript, while Tet DNA-binding sites are preferentially located at the promoter where they  
35 overlap with histone H3K4me3 peaks. The identified mRNAs are preferentially involved in  
36 neuron and axon development and Tet knock-out led to a reduction of 5hmC marks on specific  
37 mRNAs. Among the Tet-target genes were the *robo2* receptor and its *slit* ligand that function in  
38 axon guidance in *Drosophila* and in vertebrates. *Tet* knock-out embryos show overlapping  
39 phenotypes with *robo2* and both Robo2 and Slit protein levels were markedly reduced in Tet KO  
40 larval brains. Our results establish a role for Tet-dependent 5hmC in facilitating the translation  
41 of modified mRNAs primarily in cells of the nervous system.

42

## 43 Introduction

44 The regulatory function of epigenetic mechanisms such as modifications of specific DNA  
45 bases or amino acids in histone tails have been investigated for many years. These processes  
46 are overlaid upon the genetic code and have profound effects on transcription and overall  
47 gene expression. The importance of similar modifications of RNA bases has become apparent  
48 and its pervasiveness has engendered the nascent field of epitranscriptomics [1]. Approximately  
49 150 modifications of all four nucleosides have been detected in total RNA samples [2]. These  
50 modifications are mostly associated with the more abundant ribosomal and transfer RNAs but  
51 are also present in a subset of messenger RNA. The mRNA modifications provide a critical  
52 layer of regulation of the transcriptome in both *Drosophila* and vertebrates, and influence gene  
53 expression through the control of mRNA biogenesis [3]. Cytosine bases convey epigenetic  
54 information in both DNA and mRNA. 5-methylcytosine (5mC) is present in cytoplasmic and  
55 mitochondrial ribosomal RNA, t-RNA, non-coding RNA, and mRNA [4]. In contrast, 5hmC is  
56 most abundant in mRNA and is detected at a significantly lower frequency than 5mC.

57 In *Drosophila* DNA, 5mC is present at low levels and so far, no function has been  
58 documented for it [5]. However, both 5mC and 5hmC are present in *Drosophila* RNA. The  
59 5hmC modification appears to be specific to mRNA and is controlled, at least in part, by the  
60 *Drosophila* Tet (Ten-Eleven-Translocation) protein [6]. Tet proteins were first identified as DNA-  
61 modifying enzymes that function as 5-methylcytosine (5mC) hydroxylases, catalyzing the  
62 transition of 5mC to 5hmC in vertebrate DNA [7].

63 The three vertebrate *TET* genes (*TET1*, 2 and 3) function as epigenetic regulators of gene  
64 expression. The transition of 5mC to 5hmC leads to the elimination of the methyl mark on DNA  
65 and activates the transcription of target genes [7]. Mammalian TET proteins, TET3 in particular,  
66 catalyze the same reaction on RNA, converting 5mC to 5hmC in tissue culture and mouse  
67 embryonic stem cells (ESCs) [8]. Vertebrate TET1 and TET3 isoforms have an N-terminal DNA

68 binding domain (CxxC) and a C-terminal metal-binding catalytic domain (HxD), while TET2  
69 lacks the N-terminal domain [9]. *Drosophila* has only one *Tet* gene, that encodes the two major  
70 protein forms from two distinct promoters [10]. The larger protein (Tet-L) includes the DNA  
71 binding and catalytic domains, while the smaller form (Tet-S) has only the catalytic domain. Both  
72 the DNA binding and catalytic domains of *Drosophila* Tet are highly conserved [11].

73 Complete loss-of function of *Tet* (*Tet<sup>null</sup>*) leads to lethality in the late pupal stage, with partial  
74 loss-of-function alleles surviving as adults for varying amounts of time [10, 12]. All mutant  
75 animals show abnormal locomotion and knock-down of Tet in neurons that control the circadian  
76 rhythm results in perturbation of that rhythm, indicating that Tet is likely essential in diverse  
77 neuronal cells. The neuronal phenotypes agree well with the expression of the Tet gene. The  
78 gene is first expressed in three-hour old embryos and persists throughout embryogenesis and  
79 larval development predominantly in the nervous system [10, 13].

80 Here we address the function of Tet and 5hmC modification of mRNA which appears to  
81 occur independently of the reported 5mC to 5hmC transition in vertebrate DNA and the  
82 methylation of N6-mA in *Drosophila* DNA [12]. Few studies concerning the requirement of Tet in  
83 mRNA modification have been published. In tissue culture RNA modification under the control of  
84 Tet2 has been shown to lead to myeloid cell expansion through 5hmC-based regulation of  
85 mRNAs in response to pathogen challenge [14]. Additionally, in mouse Embryonic Stem Cells  
86 (ESC), Tet proteins control the 5 hydroxymethylation of key-pluripotency transcripts as well as  
87 endogenous retroviruses [15, 16].

88 While Tet function in RNA modification has been analyzed in immortalized cells in  
89 *Drosophila* and mouse, we report our work on identifying genes that are regulated by Tet in  
90 *Drosophila* embryos and nerve tissue. These Tet-target genes were identified through genome-  
91 and transcriptome-wide experiments, namely ChIP-seq, hmeRIP-seq, and RNA-seq. Two of  
92 these target genes, *robo2* and *slit*, are known for their requirement in axon guidance in both  
93 vertebrates and *Drosophila* and we chose them for further analyses. We found that *Tet* mutant

94 animals show overlapping phenotypes with *robo2* in the developing nervous system and that  
95 Tet activity is required for the proper expression of these pathfinding genes since loss of Tet  
96 results in reduced protein expression.

97

## 98 **Results**

### 99 **Tet functions as a 5-methylcytosine hydroxylase and modifies polyA<sup>+</sup>**

#### 100 **RNA in S2 cells, embryos, and larval brains**

101 Previously we have shown by dot blot analysis in S2 Drosophila cells and larval brains that  
102 the 5hmC modification was primarily found on polyA<sup>+</sup> RNA and was strongly reduced in Tet  
103 knock-down (KD) cells as well as in larval brains from complete loss-of-function animals (*Tet<sup>null</sup>*)  
104 [6]. We have confirmed and quantified these results using ultra-high-performance liquid  
105 chromatography tandem mass spectrometry (UHPLC-MS/MS). Measurements of 5mC and  
106 5hmC abundance in S2 cells indicate that 5hmC was strongly enriched in polyA<sup>+</sup> RNA  
107 whereas 5mC was underrepresented in that fraction as compared to total RNA (Fig. 1A and B).  
108 Thus, our results are consistent with the observation that 5mC is associated with rRNA, tRNA  
109 and polyA<sup>+</sup> RNA, while 5hmC is primarily found in mRNA, albeit at much lower levels than  
110 5mC. We then examined changes of 5hmC and 5mC in polyA<sup>+</sup> RNA isolated from normal  
111 and *Tet<sup>null</sup>* larval brains. We found that 5hmC was decreased about 5-fold in the mutant brains  
112 as compared to control (Fig. 1C). Moreover, 5mC was observed to increase almost 3-fold in the  
113 absence of Tet function. (Figure 1D). Similar results were found in wildtype (wt) and Tet KD  
114 embryos (Fig. S1A and B). These results confirm and extend our previous antibody-based  
115 analyses and indicate that Tet is responsible for much of the conversion of 5mC to 5hmC in  
116 *Drosophila* mRNA [6].

117

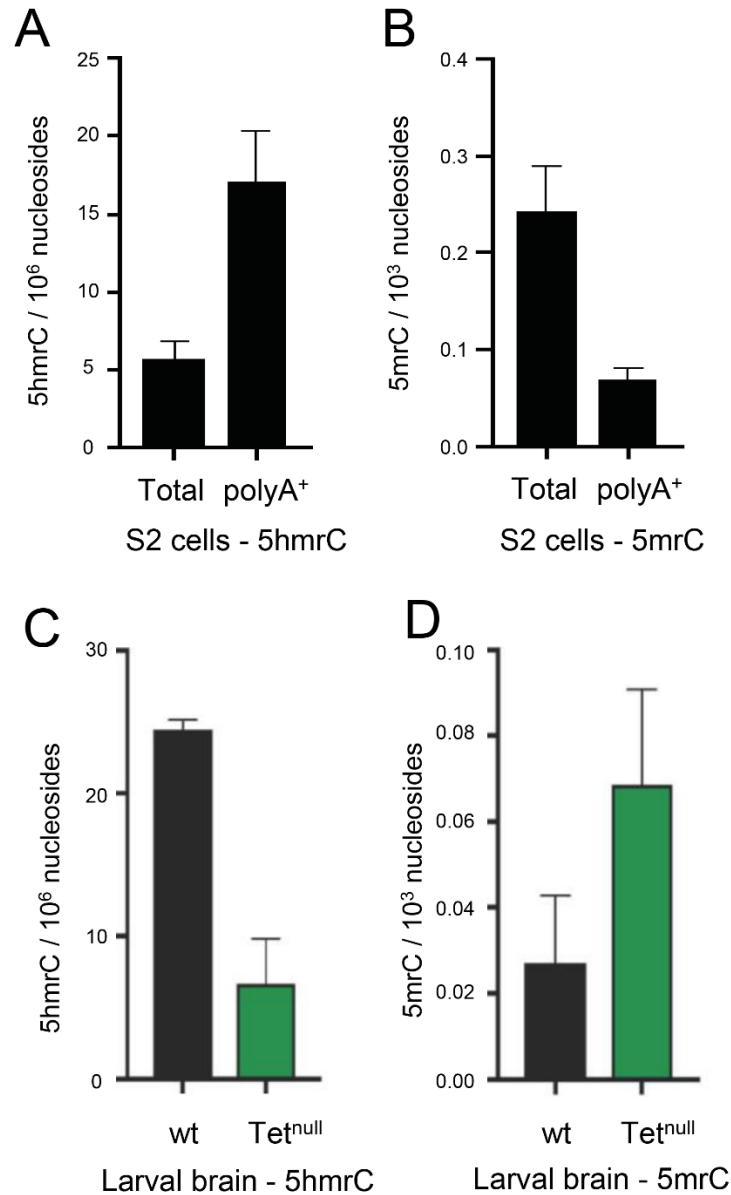

118

119 **Fig 1. 5hmC is found in PolyA<sup>+</sup> RNA and is controlled by Tet as measured by mass**

120 **spectrometry. A.** 5hmC in total and polyA<sup>+</sup> RNA isolated from S2 cells; **B.** 5mC in total and

121 polyA<sup>+</sup> RNA isolated from S2 cells; **C.** 5hmC in total RNA isolated from wild-type and Tet<sup>null</sup>

122 larval brain; **D.** 5mC in total RNA isolated from wild-type and Tet<sup>null</sup> larval brain.

123

124

## 125 **Tet binds DNA preferentially at the transcription start site of target** 126 **genes**

127 Members of the Tet protein family are known DNA and RNA binding proteins. Moreover, in  
128 vertebrates Tet proteins have been shown to bind DNA at promoter regions to regulate gene  
129 expression through active DNA demethylation [16, 17]. We sought to identify the genes that are  
130 regulated by *Drosophila* Tet. We began our experiments by determining if *Drosophila* Tet also  
131 binds DNA and mapping the binding sites. We performed ChIP-seq experiments and mapped  
132 Tet-binding peaks genome wide using chromatin isolated from the fly line that expresses the  
133 Tet-GFP fusion protein under the endogenous promoter[10]. We used two samples from  
134 different stages of development: 3<sup>rd</sup> instar larval brain and imaginal discs (larval brain fraction,  
135 LBF) and 0-12h embryos. Samples were normalized to input chromatin. As negative control we  
136 used chromatin from LBF and 0-12 h embryos lacking GFP. Underlining the specificity of the  
137 anti-GFP antibody, the ChIP material from the negative control was too low to allow library  
138 preparation and sequencing (see methods).

139 Bioinformatic analysis of the LBF ChIP-seq results identified 3413 Tet binding peaks  
140 distributed on 2240 genes. An example of Tet binding peak profile is shown in Fig. 2A. Tet  
141 preferentially occupies promoter regions (Fig. 2B) and shows the strongest binding to promoter  
142 regions. (Fig. 2C). Analysis of the Tet bound sites identified a highly conserved CG-rich  
143 sequence via MEME-ChIP Motif Analysis (Fig. 2D and Fig. S2C). This motif is similar to that  
144 identified from similar studies-of Tet1-bound loci in ESCs. [17]

145 The composite model of Tet-binding across the coding region illustrates that Tet occupancy  
146 is highest near the promoter and gradually decreases until it undergoes a notable drop at the  
147 transcription termination sites (TTS). This closely mirrors the profile observed for H3K4me3, an  
148 epigenetic mark associated with actively transcribing regions frequently found at transcription  
149 start sites [18] (Fig. 2E). While 36% of all Tet peaks co-localize with this chromatin modification

150 (H3K4me3, Fig. 2F), 40% of the Tet binding sites at the promoter co-localized with the  
 151 H3K4me3 mark (Fig. 2G).  
 152

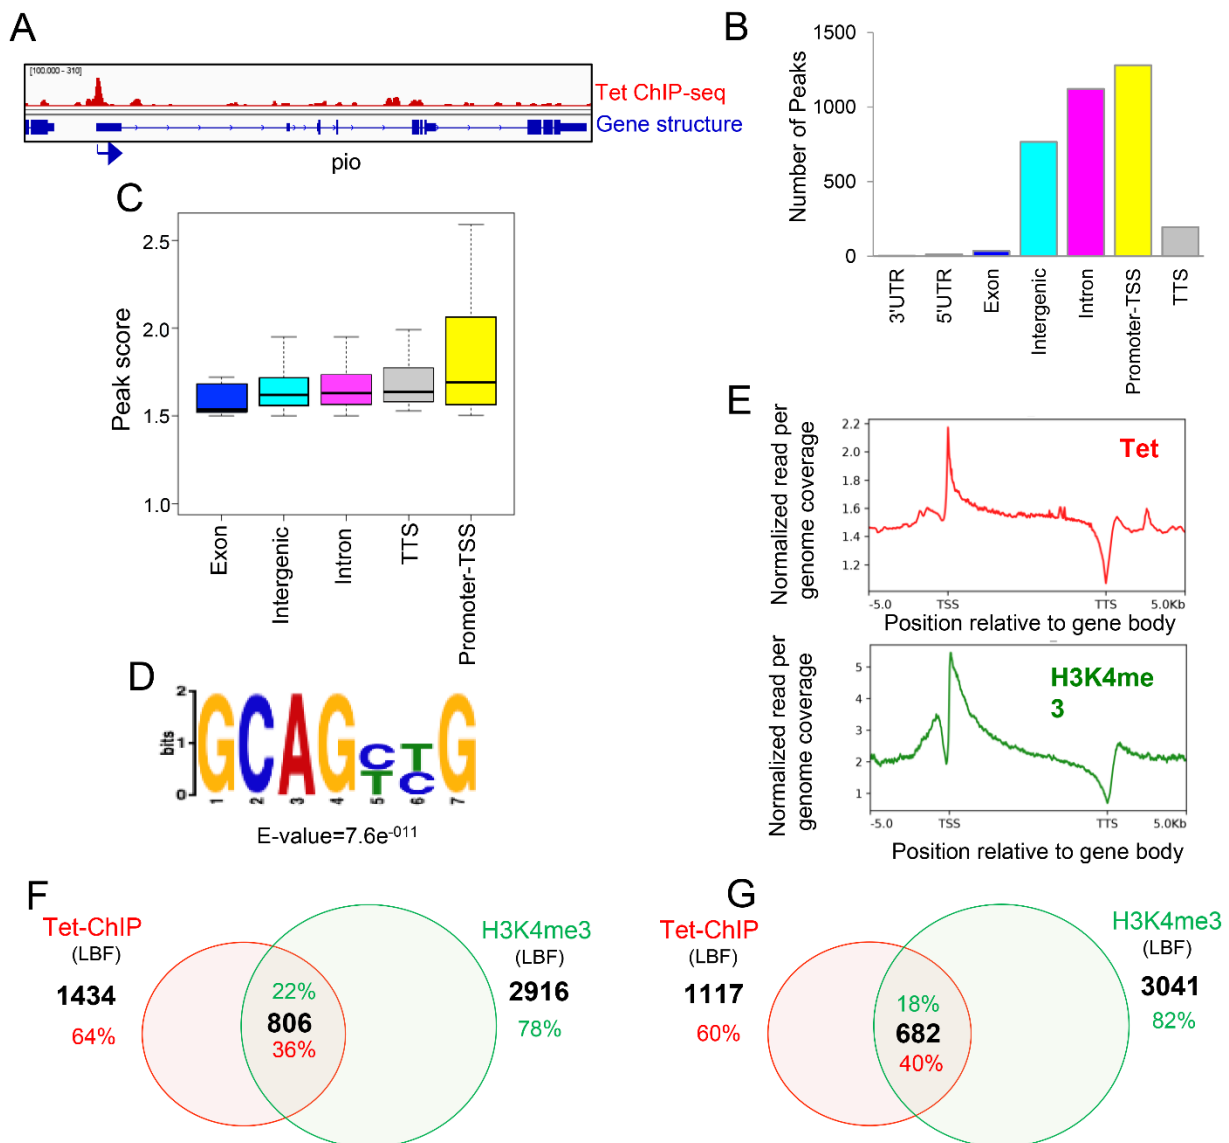

153  
 154 **Fig 2. Genome-wide Tet protein binding sites in Drosophila larval brain fractions, Tet-**  
 155 **ChIP-seq analysis: A.** Representative gene showing Tet binding peak at the promoter. Arrow  
 156 indicates promoter orientation; **B.** Genome wide distribution of Tet occupancy in larva brain  
 157 fraction. The genomic regions (3'UTR, 5'UTR, exons, intergenic, introns, promoter-TSS  
 158 transcription start sites, and TTS, transcription termination sites) were defined based on RefSeq



159 gene (dm6) annotations; **C.** Strength of Tet enrichment on fly genome counted as peak score  
160 across the gene body plotted from 3413 peaks; **D.** Genome wide distribution of Tet binding sites  
161 displayed as enriched sequence motif among 3413 peaks identified by de novo motif discovery  
162 in this study; **E.** Binding profile of LBF Tet (red) and H3K4me3 (green) within the gene body  $\pm$   
163 5kb; **F.** 36% of Tet occupied genes on various genomic regions overlapped with the H3K4me3  
164 mark; **G.** Promoter-associated Tet binding peaks on 40% of genes overlap with H3K4me3  
165 marks.

166

167 In embryo samples, we detected 5180 Tet-binding peaks associated with 2578 genes. An  
168 example of a Tet binding peak profile is shown in Fig. 3A. Tet is enriched throughout the gene  
169 body and intronic regions (Fig. 3B) however the strength of binding is, like in LBF, strongest at  
170 promoters (Fig 3C). The Tet-binding profile across the coding regions is similar to that observed  
171 in LBF (Fig. 3E). Analysis of the DNA sequences bound by Tet protein in embryos uncovered a  
172 highest ranking binding motif that shows significant similarity to the larval Tet consensus  
173 sequence (Fig. 3D and S2) and, as with the larval ChIP samples, we observe Tet occupancy to  
174 be correlated with H3K4me3 binding sites, at promoters (Fig 3E): 42% of all embryonic Tet  
175 peaks co-localized with H3K4me3 chromatin modification marks (Fig. 3F) and 51% of the  
176 promoter binding sites overlapped with H3K4me3 mark (Fig. 3G). In both embryos and LBF, Tet  
177 binds to approximately the same number of target genes and 30% of Tet's targets are identical  
178 in both tissues (Fig 3H).

179

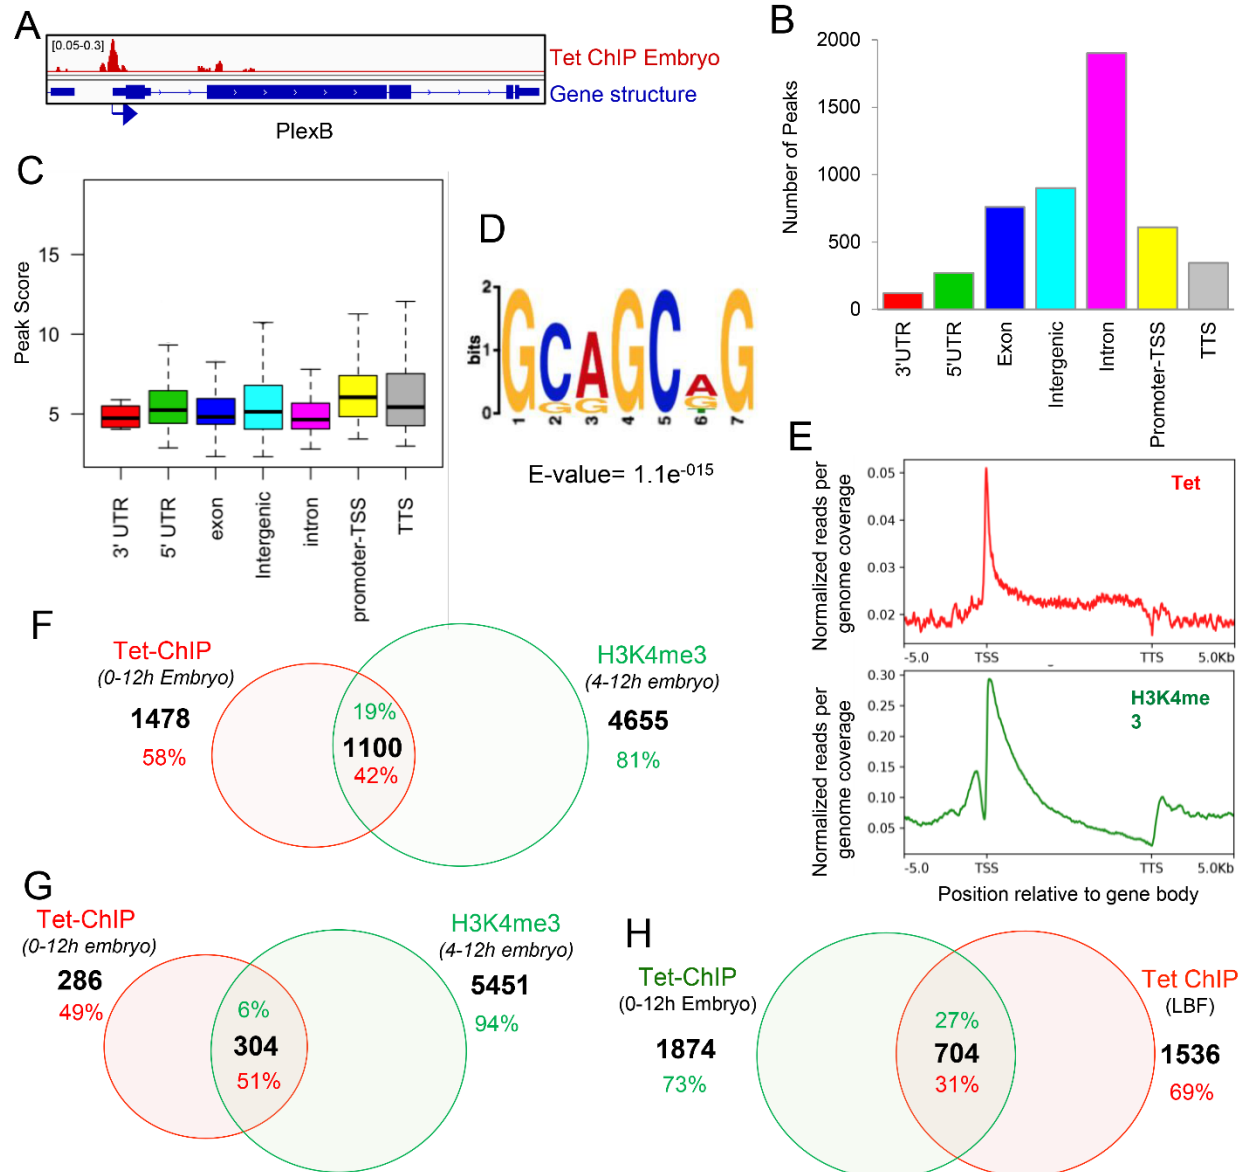

180

181 **Fig 3. Genome-wide Tet protein binding sites in Drosophila 0-12 hour embryos, Tet-ChIP-**

182 **seq analysis: A.** Representative gene showing Tet binding peak at the promoter. Arrow

183 indicates promoter orientation; **B.** Genome wide distribution of embryo Tet ChIP-seq peaks in

184 different genomic regions; **C.** Strength of Tet enrichment on different genomic regions counted

185 as peak score plotted from 5180 peaks; **D.** Enriched sequence motif among 5180 embryo Tet

186 ChIP-seq peaks identified by de novo motif discovery in this study; **E.** Binding profile of embryo

187 Tet (red) and H3K4me3 (green) within the gene body  $\pm$  5kb; **F.** 42% of Tet bound genes in

188 embryo have H3K9me3 modification; **G.** 51% of genes that show binding of Tet to the promoter  
189 that overlap with H3K4me3; **H.** 27% of Tet bound genes in embryo also have Tet binding peaks  
190 in larva brain fraction.

191

192 Our ChIP-seq results indicate that Tet binding sites are distributed throughout the physical  
193 map of the genome (Figs S2A and S2B). To confirm these results and show that the Tet-DNA  
194 binding domain is sufficient to target Tet to DNA, we constructed transgenic flies carrying a Myc-  
195 tagged DNA-binding domain of Tet (CxxC) under the control of the heat shock promoter (hsp70-  
196 GAL4::UAS-TetCxxCRFPmyc). We expressed the Tet DNA-binding domain by exposing larvae  
197 to heat shock and stained salivary glands with anti-Myc and anti-H3K4me3 antibody. As  
198 indicated by Chip-seq, Tet showed many bands distributed on all arms of the chromosomes, but  
199 virtually no staining of the chromocenter which contains very few genes. H3K4me3 is also  
200 present in a distinct binding pattern on all chromosomes, but in contrast to Tet is abundant in  
201 the chromocenter and the nucleolus. These staining results agree with our observation that Tet  
202 binds to genes on all chromosomes of *Drosophila* (Fig S2A).

203 Our Chip-seq experiments were done in embryos and LBF, two tissues at diverse stages of  
204 fly development, but in which Tet protein is highly expressed. In both tissues we identified about  
205 2500 genes that showed significant Tet-binding genome-wide. Tet binding characteristics were  
206 similar in both tissues in that the most significant Tet-binding peaks, showing strongest binding,  
207 were preferentially located at promoters. About 30% of the Tet DNA-binding sites are identical in  
208 embryos and LBF. Thus, it appears that only some of the Tet targets are fixed while others  
209 show stage-specific variations throughout development.

210

211

212

## 213 **Identification of Tet-target mRNAs by hMeRIP-seq in fly tissues**

214 We next determined how many of the genes with Tet-binding peaks also showed 5hmC  
215 modifications of their RNA. To do this we mapped Tet-dependent 5hmC modifications on RNAs  
216 transcriptome-wide in the same tissues we used for our Chip-seq analysis. We first performed  
217 hMeRIP-seq on total RNA using basically the same approach we used previously in S2 cells [6].  
218 RNAs isolated from wt 0-12 h embryos and from wt and *Tet<sup>null</sup>* Larval Brain Fractions (LBF) were  
219 treated with anti-5hmC antibody or immunoglobulin as negative control, and followed by Next  
220 Generation Sequencing (NGS, see methods).

221 In the embryo, we identified 1815 peaks on 1402 mRNAs. A representative 5hmC peak  
222 profile is shown in Fig. 4A. The 5hmC modification is preferentially associated with coding  
223 sequences and a comparison to the expected distribution of peaks shows that the distribution of  
224 the modification is not random (Fig. 4B). Moreover, as the presence of the 5hmC modification  
225 is not proportional to the abundance of the mRNA the modification appears to function broadly  
226 within the transcriptome and is not a regulatory modality restricted either to rare or  
227 hyperabundant transcripts (Fig. 4C). The 5hmC-associated sequences identified from these  
228 experiments revealed a specific UC-rich motif present within these mRNAs that closely  
229 resembles the motif observed in S2 cells and mammalian ESCs (Fig. 4E and Fig. S3) [6, 16].

230

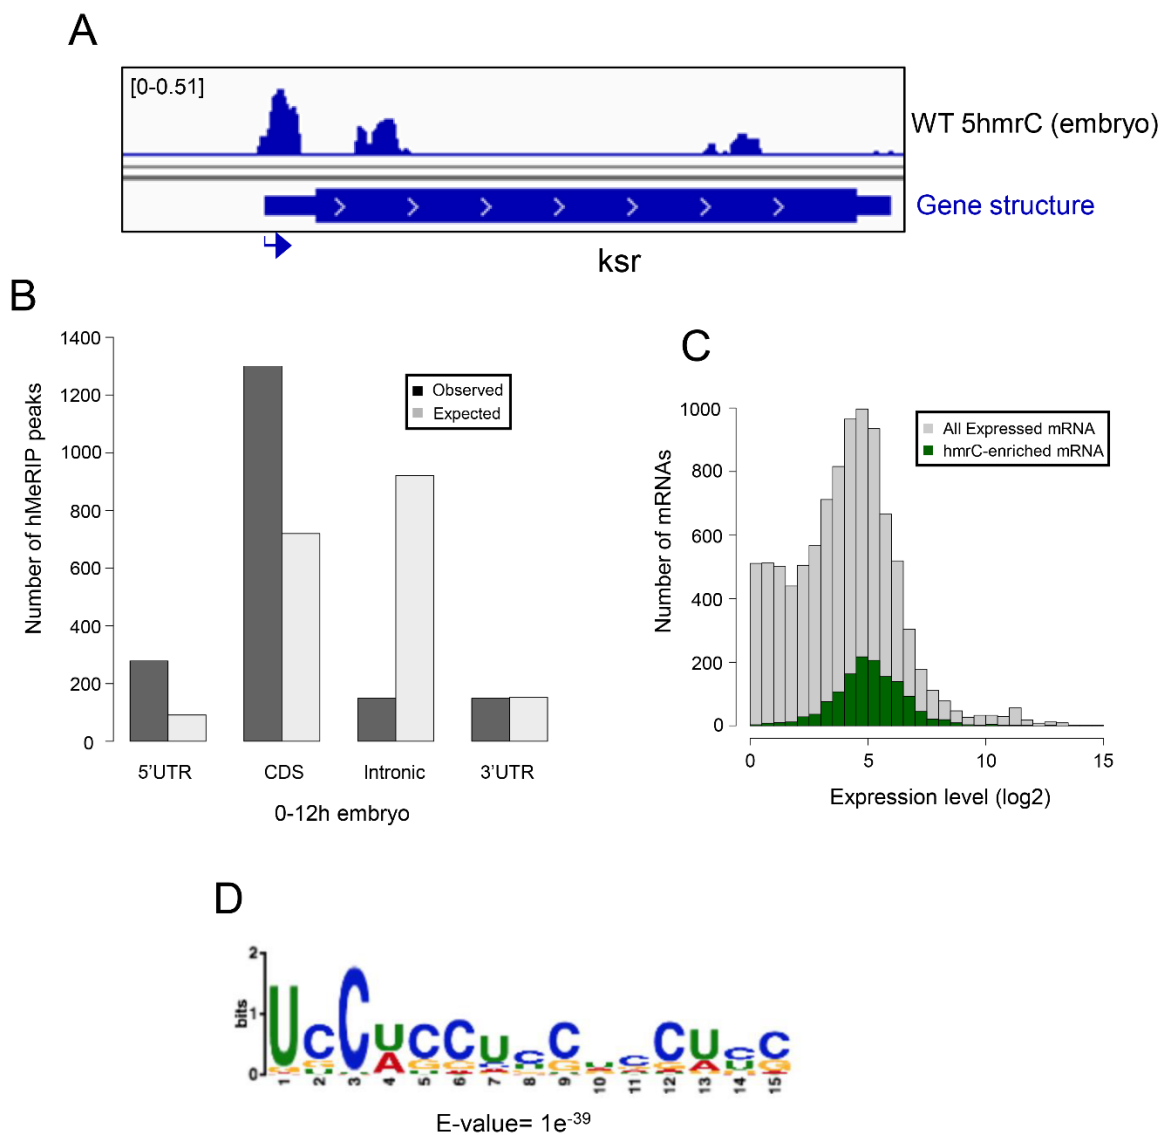

231  
232 **Fig 4. Transcriptome-wide distribution of 5hmrC in Drosophila 0-12 h embryo mRNA,**  
233 **hMeRIP-seq: A.** Example of gene showing 5hmrC peak distribution. Arrow indicates promoter  
234 orientation; **B.** Distribution of 5hmrC peaks on embryonic transcripts and comparison of actual  
235 and predicted peaks according to the type of structural element within the transcript; **C.**  
236 Distribution of all expressed (gray) or 5hmrC enriched (green) transcripts, showing the number  
237 of mRNAs as a function of their expression levels in wt embryo; **D.** Sequence motif identified in  
238 within 1815 5hmrC peaks.  
239

240 In mRNA from the wild type LBF, we detected 3711 peaks on 1775 transcripts. A  
241 representative profile of 5hmC enriched peaks in wt and *Tet<sup>null</sup>* is shown in Fig. 5A. In wt the  
242 peaks were distributed across the gene body (Fig. 5B) and 5hmC marks were found to  
243 decorate mRNAs independent of their abundance (Fig. 5D). Analysis of the peak sequences  
244 indicated the modifications were primarily associated with a UC-rich motif highly related to that  
245 identified in embryonic samples (Fig. 5F). In mRNA from *Tet<sup>null</sup>* larvae we identified 5,374 peaks  
246 in 1710 mRNA. Comparison of mRNAs identified in both the wt and *Tet<sup>null</sup>* samples indicate that  
247 the distribution of 5hmC peaks is similar both in the presence and absence of Tet function.  
248 However, In the *Tet<sup>null</sup>* samples, 45% of the transcripts identified had at least one peak that  
249 showed a reduction in the 5hmC modification relative to wild-type (Fig. 5C) and the reduction  
250 was most pronounced on intronic and coding region peaks (45% and 46%) compared to the  
251 peaks found in the UTRs (5', 19%, and 3', 16%). Thus, within a given mRNA transcript some  
252 peaks were affected in *Tet<sup>null</sup>* LBF, while others remained unchanged. These results suggest the  
253 preference of Tet to modify specific regions of transcripts.  
254

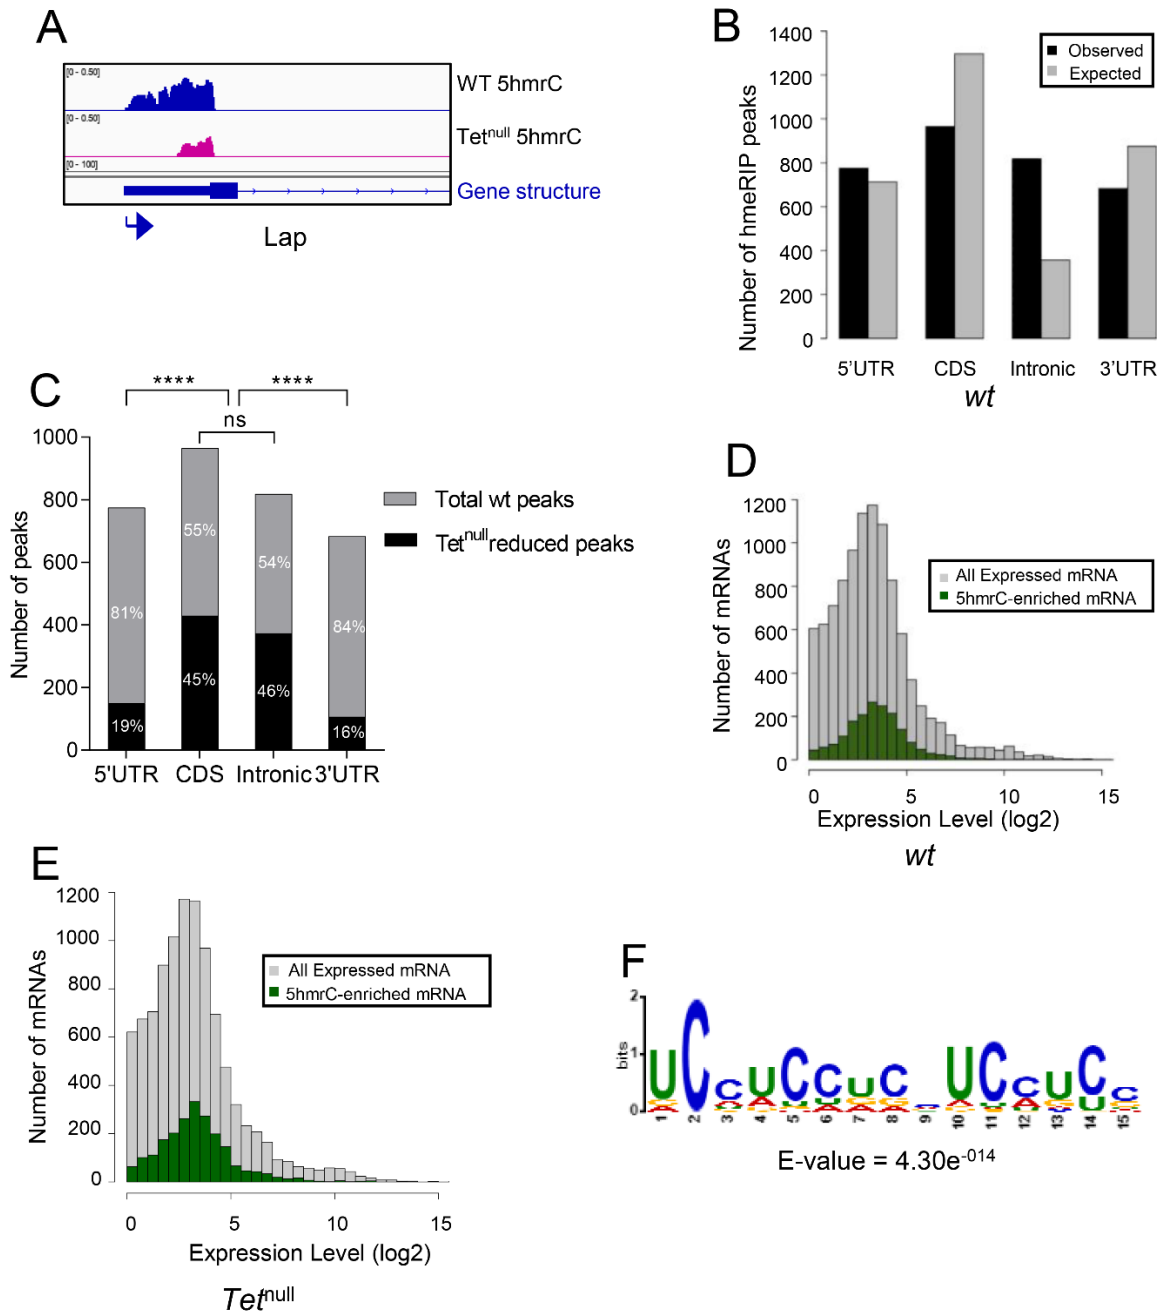

255

256 **Fig 5. Transcriptome-wide distribution of 5hmC in LBF mRNA, hMeRIP-seq: A.** Example  
 257 of gene showing 5hmC peak distribution. Arrow indicates promoter orientation; **B.** Distribution  
 258 of 5hmC peaks on *wt* LBF transcripts and comparison of actual and predicted peaks according  
 259 to the type of structural element within the transcript; **C.** Distribution of 5hmC peaks reduced in  
 260 *Tet<sup>null</sup>* compared to the peaks found in the *wt* LBF; note that peaks in the protein coding

261 sequences and introns are significantly more reduced in *Tet<sup>null</sup>* than are the peaks in the 5' and  
262 3' UTR; **D.** Distribution of all expressed (gray) or 5hmC enriched (green) transcripts, showing  
263 the number of mRNAs as a function of their expression levels in wt LBF; **E.** Distribution of all  
264 expressed (gray) or hmC enriched (green) transcripts, showing the number of mRNAs as a  
265 function of their expression levels in *Tet<sup>null</sup>* LBF; **F.** Sequence motif identified within 3711 5hmC  
266 peaks.

267

268 In addition, 37% of the modified mRNA in embryos were also identified in the LBF, while 30%  
269 of the larval modified mRNAs were also present in the embryonic fraction (Fig. S4C). Taken  
270 together these results suggest that Tet targets a distinct cohort of mRNAs in embryos and larval  
271 brains and controls specific 5hmC modifications along transcripts.

272

## 273 **RNA levels in wild type and *Tet<sup>null</sup>* larval brains**

274 Our results indicate that Tet binds to the promoter of a subset of possibly actively transcribed  
275 genes and controls the 5hmC modification of their mRNAs. The modification may have an  
276 effect on the stability, processing, and/or translation of the transcripts. To determine if there is a  
277 link between 5hmC modification and mature mRNA levels, we sequenced (NGS) RNA isolated  
278 from wildtype and *Tet<sup>null</sup>* LBF. We found that out of 9000 total transcripts the levels of 445 were  
279 significantly increased and 115 were decreased in *Tet<sup>null</sup>* LBF (Fig. 6A). When we compared  
280 these mRNAs with the 5hmC-modified mRNAs present in LBF, we found that 1716 or ~20% of  
281 the total transcripts were modified. However, of these modified mRNAs only 15, or 3 % were  
282 upregulated in *Tet<sup>null</sup>*, and 13 or 11 % were decreased (Fig. 6A, B). This result indicates that the  
283 levels of the vast majority of 5hmC modified mRNAs do not change levels in *Tet<sup>null</sup>* LBF. Thus,  
284 the 5hmC modification of the mRNAs does not appear to generally control the steady state  
285 level of transcripts.



286

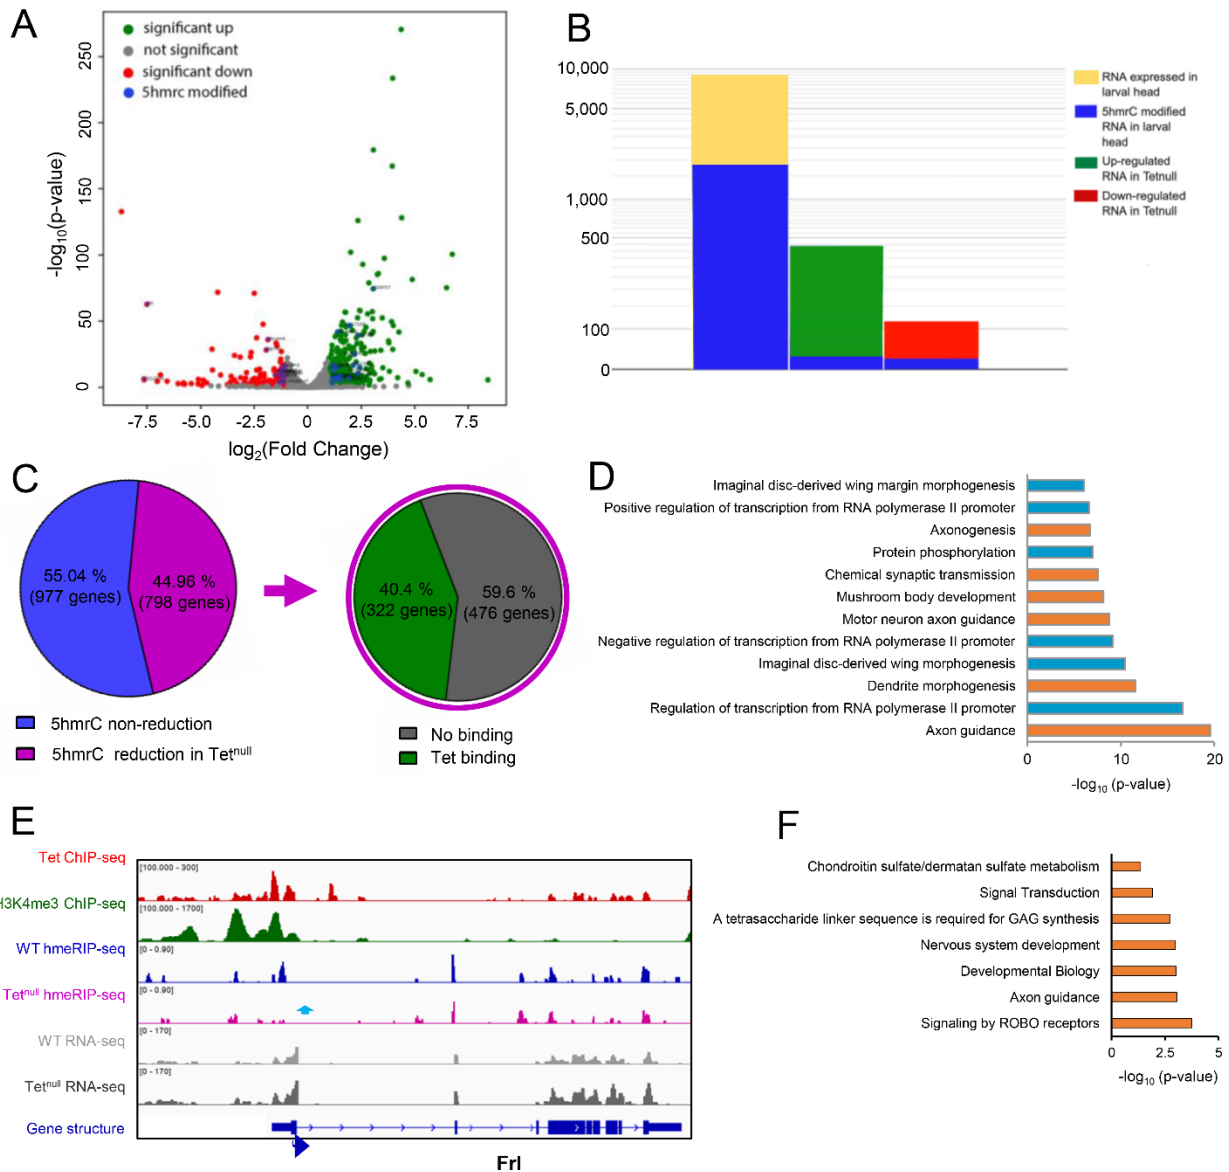

287

288 **Fig 6. The 5hmrc modified mRNAs.** **A.** Volcano plot of mRNAs that are increased (green) or  
 289 decreased (red) relative to wildtype levels in *Tet<sup>null</sup>* LBF preparations; **B.** Proportion of modified  
 290 mRNAs in all 9000 wild type transcripts, and in the decreased and increased portions of mRNAs  
 291 from *Tet<sup>null</sup>* LBF; note the low level of modified transcripts in these two groups of mRNAs; **C.** The  
 292 percent of transcripts that show a reduction of 5hmrc modification in *Tet<sup>null</sup>* compared to wt and  
 293 the percent of transcript that showed both 5hmrc reduction and Tet binding to the

294 corresponding gene; **D.** GO term analysis of transcripts that show reduction in 5hmC  
295 modification; **E.** IGV tracks of a representative gene showing the distribution of indicated peaks  
296 along the gene body; **F.** Pathway analysis of neuronal genes shown in **D.** ChIP-seq, hMeRIP-  
297 seq and RNA-seq data are shown in reads per million with the y-axis. Genomic regions with  
298 statistically significant enrichment were measured by  $-\log_{10}$  (peak P values);  $P < 10^{-8}$  are  
299 indicated. The effects of Tet depletion on 5hmC levels are also represented. The Y axis scale is  
300 indicated above each track. Blue arrows show reduction in 5hmC peaks.

301

## 302 **Cellular function of genes controlled by Tet**

303 Tet protein is detected in embryos from blastoderm stage onwards and is most strongly  
304 expressed in neuronal tissues and also in cardiac and muscle precursor cells. In third instar  
305 larvae, the gene is strongly expressed in the brain and neuronal cells in imaginal discs [10]. It  
306 was therefore important to assess if our molecular analyses would agree with this expression  
307 pattern and if target genes are associated with neuronal functions. We performed Gene  
308 Ontology (GO) analyses of the genes identified via ChIP-seq as well as of the genes encoding  
309 the 5hmC-modified mRNAs that were identified in our hMeRIP-seq analyses in the embryo and  
310 the LBF (Fig. S5 A-D). The genes identified in both embryonic and larval samples through both  
311 ChIP-seq and hMeRIP-seq all show enrichment for genes involved in axon guidance. When we  
312 looked at the GO terms of transcripts that showed a reduction of the 5hmC modification in  
313 *Tet<sup>null</sup>* samples, axon guidance genes were highly represented, in fact, GO terms of transcripts  
314 showing reduction of the modification in *Tet<sup>null</sup>* samples identified mostly genes associated with  
315 neuronal functions (see highlighted genes in Fig. 6C). Pathway analysis showed that ROBO  
316 receptor signaling is the most enriched pathway in the group of neuronal genes (Fig. 6F).

317 It is striking that in our two very different experimental approaches, ChIP-seq and hMeRIP-  
318 seq we identified genes with overlapping functions (Fig. S5 A-D). The importance of our results

319 is also underlined by the observation that of the transcripts that reduction of 5hmC levels in  
320 *Tet<sup>null</sup>* samples, 40% were derived from genes that also have at least one Tet DNA-binding site  
321 (Fig. 6C). In LBF samples, 43% of all the transcripts that show 5hmC modification are derived  
322 from genes that have been shown to bind Tet (Fig. S4A). In embryo samples, 29% of all the  
323 transcripts that showed 5hmC modification are derived from genes that bind Tet (Fig. S4B).  
324 Further, 29% of modified transcripts in embryos and 37% of modified transcripts in LBF show  
325 5hmC marks at both developmental stages (Fig. S4C). An example of the experimental IGV  
326 tracks of all our results for a gene in the larval CNS and the embryo are shown in Fig. 6D and  
327 Fig. S6A, respectively.

328 These analyses show that Tet-dependent 5hmC is often found on mRNAs derived from  
329 genes that show Tet binding. Notably, close to 50% of transcripts that show a reduction in the  
330 5hmC mark in *Tet<sup>null</sup>* tissues are derived from Tet-target gene identified by ChIP-seq. However,  
331 the levels of these mRNAs are generally unaffected by the loss of Tet suggesting that the  
332 5hmC modification does not affect steady state level of mRNAs but other aspects of mRNA  
333 function such as translation or localization.

334

## 335 **Tet target genes**

336 We used the results above to identify Tet-target genes and sought to determine whether the  
337 phenotypic effects of the loss of Tet's activity were derived from its inability to regulate target  
338 mRNAs [6, 10]. We looked for genes that are 1. active in the nervous system where Tet is  
339 enriched and 2. showed Tet protein binding to DNA, and 3. whose mRNA showed a reduction in  
340 5hmC in *Tet<sup>null</sup>* animals. Axon guidance genes as a group frequently showed Tet-DNA-binding  
341 and 5hmC mRNA modification by Tet (Fig. 6D) and Robo receptor signaling is the most  
342 enriched pathway. Among the genes that fulfilled the three criteria were two well-studied genes  
343 that function in Robo receptor signaling, *robo2* and *slit* (Fig. S7). The Slit/Robo signaling

344 pathway is required for axonal pathfinding and the bilateral organization of the CNS in both  
345 vertebrates and invertebrates [19]. Robo proteins are transmembrane receptors on axonal  
346 growth cones for the secreted Slit ligands. Glial cells present at the midline secrete Slit and  
347 signaling between Robo and Slit is essential to inhibit midline crossing of axons through  
348 commissures via repulsion [20]. Importantly, Slit has previously been implicated as a target of  
349 Tet activity in midline glia [13]. We examined axonal pathfinding in the embryonic ventral nerve  
350 cord (VNC) and reasoned that if Tet impinges upon the levels of Robo2 and/or Slit, we should  
351 observe midline defects in *Tet<sup>null</sup>* animals like those seen in *robo2* or *slit* mutant embryos. Gross  
352 CNS commissural structure is maintained in *Tet<sup>null</sup>* embryos (Fig. 7B', HRP), however,  
353 examination of neuronal subpopulations within the longitudinal neuropils indicates frequent  
354 pathfinding defects. A well described neuronal subpopulation, Fas2+ neurons, exhibit extensive  
355 midline crossing of growth cones in these *Tet<sup>null</sup>* embryos (Fig. 7B, arrows; Table S1).  
356 Additionally, the most lateral of the Fas2+ longitudinal tracks are often incomplete or absent (Fig.  
357 7B, 46%-arrowheads). A second subpopulation of neurons expressing Connectin also appears  
358 to be altered in *Tet<sup>null</sup>* VNCs and fails to populate one of the longitudinal tracks compared to wild  
359 type (Fig. S7B; arrows). These phenotypes are strikingly similar to the axonal pathfinding  
360 defects seen in *robo2* embryos with Tet's effects being slightly more severe (Fig. 7B and C and  
361 Table S1) [20]. We sought to determine whether the reduction of Tet-mediated 5hmrC  
362 deposition on the *robo2* or *slit* mRNAs resulted in mRNA species with reduced activity or  
363 potential for expression. Thus, we examined genetic interactions between Tet and the Slit/Robo  
364 signaling pathway in *Tet<sup>null</sup>* embryos lacking one copy of *robo2* or *slit*. We additionally examined  
365 Robo1, a gene that is also involved in midline repulsion but is not 5hmrC modified. Decreasing  
366 the dose of Robo2 or Robo1 in a *Tet<sup>null</sup>* background has little effect on Fas2+ axonal pathfinding  
367 in comparison to *Tet<sup>null</sup>* alone (table S1). The failure to see an effect with Robo2 may stem from  
368 the observation that the levels of midline crossing in *Tet<sup>null</sup>* embryos exceeds that seen for  
369 *robo2<sup>null</sup>* embryos (Table S1 and [21]). However, reducing the gene dose of *Slit* by half

370 enhances the midline crossing of Fas2+ neurons in *Tet<sup>null</sup>* embryos (Table S1; Figure 7B and E;  
371 48% vs 32% *Tet<sup>null</sup>*), whereas heterozygous *slit* embryos show midline crossing in < 1% of  
372 segments (Fig. 7D). Moreover, *Tet<sup>null</sup>* mutant animals appear to be sensitized towards midline  
373 crossing in general when lacking full *slit* function. Notably, the commissures (red arrowheads,  
374 Fig. 7E') are poorly defined, likely due to too many axons inappropriately transiting the midline.

375 Given that *robo2* or *slit* encode mRNAs that carry 5hmC mark and exhibit a reduction in a  
376 *Tet<sup>null</sup>* background while maintaining normal steady state mRNA levels, we expected Tet to  
377 potentially control their protein levels (Fig. S7). Indeed, both proteins were clearly reduced in  
378 brain extracts from *Tet<sup>null</sup>* larvae relative to wt (Fig. 7F and 7F'). These results support the idea  
379 that one function of Tet-dependent 5hmC modification is to control high levels of translation of  
380 specific target mRNAs and that in the context of embryonic axonal pathfinding Tet provides an  
381 additional, novel layer of regulation of the medically important Slit/Robo pathway.

382

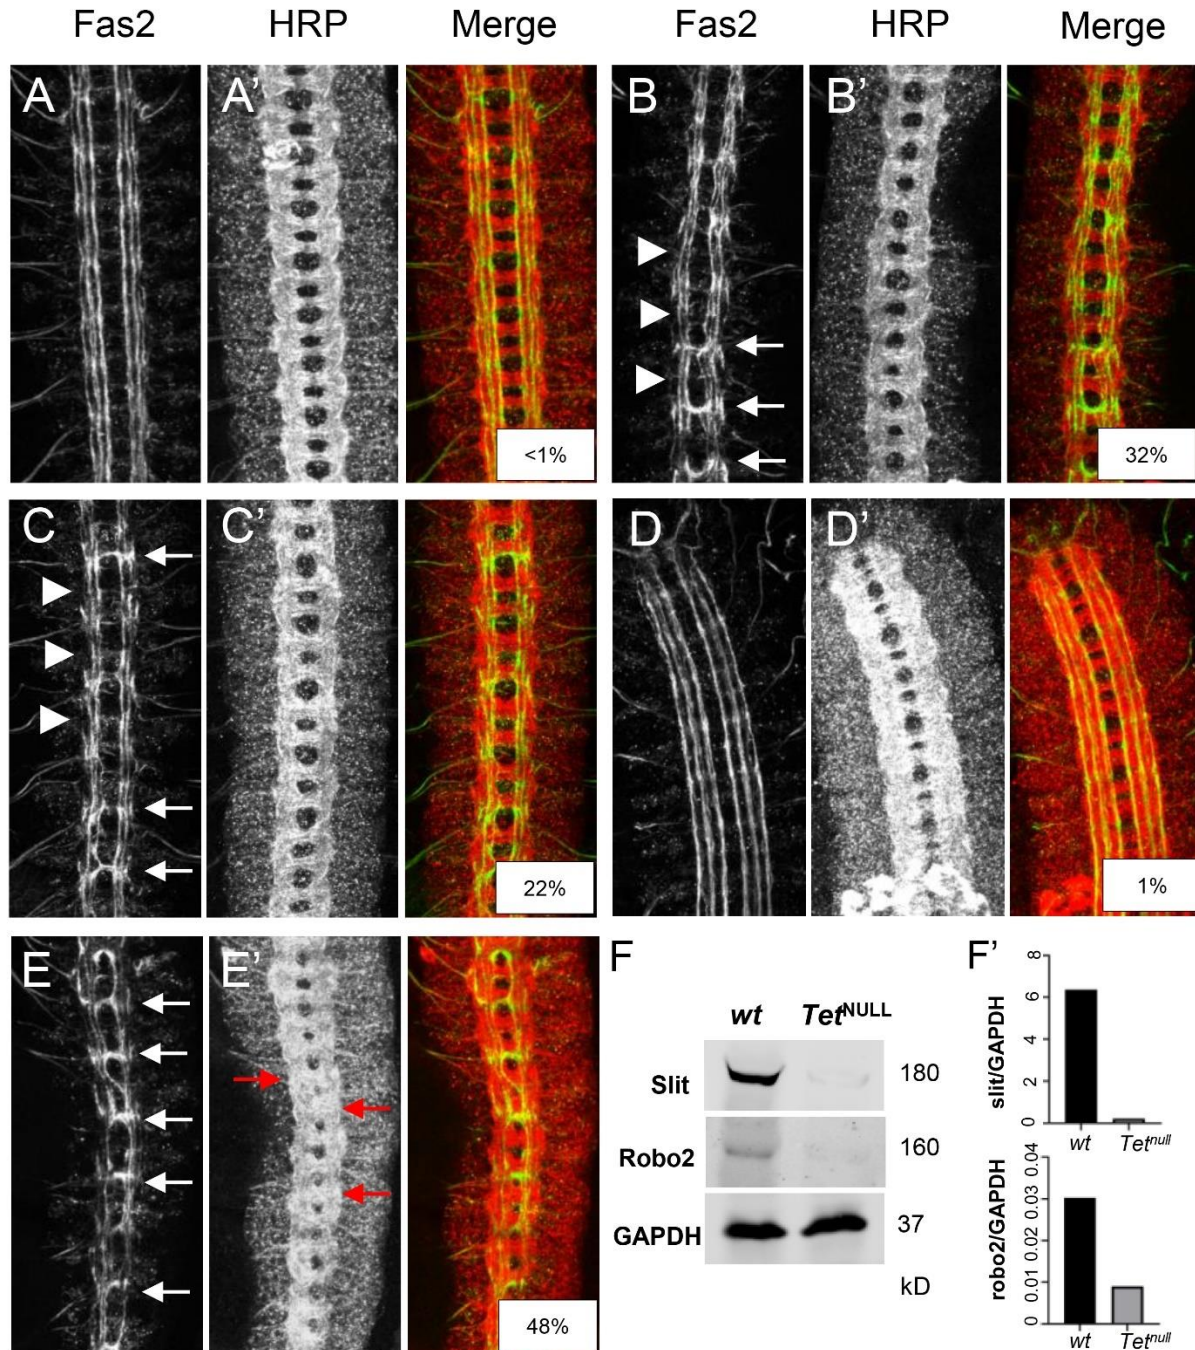

383

384

385 **Fig 7. Tet regulates the expression of members of the Slit/Robo signaling pathway.** Stage

386 16/17 embryonic ventral nerve cords immunolabelling a subpopulation of CNS neurons with

387 Fas2 (A-C) and the general neuronal cell surface marker, HRP (A'-C'). A, A': wild-type; B, B':

388 *Tet<sup>null</sup>/Tet<sup>null</sup>*, C, C': *robo2<sup>x123</sup>/robo2<sup>x123</sup>*, D, D': *slf<sup>2</sup>/+*; E, E': *slf<sup>2</sup>/+*; *Tet<sup>null</sup>/Tet<sup>null</sup>*. Examples of midline

389 crossing are indicated by white arrows and malformed lateral Fas2 tracks are noted with white  
390 arrowheads. Red arrows in **E'** highlight commissural malformations present in *Tet<sup>null</sup>/Tet<sup>null</sup>* embryos with  
391 reduced slit dosage. Percentage midline crossing is displayed in the overlay panels. **F.** Western  
392 blot showing Slit and Robo2 proteins in *wt* and *Tet<sup>null</sup>/Tet<sup>null</sup>* 3<sup>rd</sup> Instar larval brain extracts.  
393 GAPDH is the loading control; **F'**. Normalized levels of Slit and Robo2 quantitated via optical  
394 densitometry.

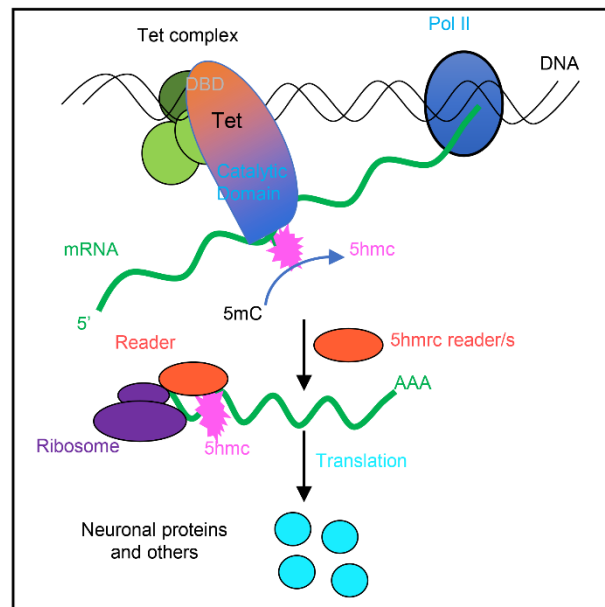

395

396 **Fig 8.** The proposed model of Tet functions in RNA modification (see text for description).

397 Based on all our results we suggest the model shown in Figure 8, we propose that Tet binds,  
398 possibly as a complex to DNA binding sites mediated by its DNA-binding domain. The Tet  
399 binding sites are preferentially located at promoter regions of genes that also show H3K4me3,  
400 generally accepted as a mark of active transcription. We further postulate that Tet binds nascent  
401 mRNA through its RNA binding domain or possibly in cooperation with associated proteins  
402 (RNA-binding proteins, and with a so far unidentified RNA methyltransferase) to set the 5hmC  
403 mark. The 5hmrc marked mRNAs are then exported from the nucleus and recognized by a  
404 reader protein that will control the efficient loading of the modified mRNAs onto polysomes,  
405 where the mRNAs are proficiently translated.

406 While several aspects of this model need to be investigated our results provide a consistent  
407 framework of how Tet and Tet-dependent RNA modifications may function in controlling gene  
408 expression. Recently, mutations in human Tet3 have been shown to cause neurodevelopmental  
409 delays. It will be interesting to investigate if 5hmC RNA modification is deficient in the affected  
410 patients [22].

411

## 412 Discussion

413 In our previous study we investigated if Tet proteins, that are well known as 5-methylcytosine  
414 (5mC) hydroxylases catalyzing the change from 5mC to 5hmC in DNA, can have a similar  
415 function in RNA [6]. For these molecular studies we mainly used *Drosophila* S2 cells as source  
416 material. In the present study we used animal sources, embryos, and larval brain tissues, to  
417 investigate the function of Tet in modifying mRNA *in vivo*. We also wanted to delineate the  
418 molecular and cellular processes for which the modification is required, and to identify *in vivo*  
419 targets of the Tet protein.

420 Our results confirm the presence of the 5hmC modification in mRNA by mass spectrometry  
421 in embryos, larval brain tissue and S2cells. We further show that Tet protein binds to DNA at  
422 distinct sites, functions in modifying mRNAs, and that this modification modulates translational  
423 output of the mRNAs. We used our molecular results to identify Tet target genes. We selected  
424 genes that, 1. contain promoter proximal Tet-binding site(s) that overlap with H3K4me3  
425 modifications, 2. whose mRNA showed 5hmC modifications that were reduced in *Tet<sup>null</sup>*  
426 neuronal tissues, and 3. whose mRNA levels displayed negligible changes in *Tet<sup>null</sup>* neuronal  
427 tissues.

428 We found that these target genes were most often associated with axonal growth and  
429 pathfinding. Two such genes, *robo2* and *slit*, were selected because they fulfill the conditions  
430 outlined above and are members of a conserved set of cell-signaling molecules responsible for



431 controlling the activity of axonal growth cones of the developing CNS in vertebrates and  
432 invertebrates [23]. Phenotypic analysis of the developing CNS in Tet-deficient animals indicates  
433 a specific requirement for Tet in the proper patterning of the CNS; *Tet<sup>null</sup>* embryos showed a  
434 similar CNS phenotype to Robo2 deficient animals. Indeed, in the absence of Tet levels of  
435 Robo2 and Slit proteins are reduced in the larval brain, resulting in aberrant axonal pathfinding  
436 and other defects in nervous system patterning [10, 13].

437

### 438 **Tet controls the 5hmC modification on mRNA**

439 In mass spectrometry experiments we determined that 5hmC is strongly enriched in polyA<sup>+</sup>  
440 RNA confirming our previous dot blot results. This modification is much rarer than other well-  
441 studied mRNA modifications, such as 5mC or 6mA (Fig. 1) [6, 24]. Because Tet is expressed in  
442 *Drosophila* almost exclusively in nerve cells, we determined the levels of 5mC and 5hmC in  
443 two tissues that show high Tet expression, wild type 0-12 h embryos and in larval brains. We  
444 found that 5mC levels are about two orders of magnitude higher than 5hmC levels ( $\sim 2 \times 10^5$   
445 5mC and  $\sim 2 \times 10^7$  5hmC in larval brains), and therefore detecting 5hmC is not trivial.

446 The presence of 5hmC is notably reduced ( $\sim 5$  fold) in *Tet<sup>null</sup>* samples. Our results are  
447 consistent with the *Drosophila* Tet enzyme being responsible for this 5hmC modification (Fig. 1  
448 and S1). However, the remaining  $\sim 20\%$  of the wild type 5hmC levels in mutant tissues that lack  
449 Tet, point to the presence of an additional hydroxymethyltransferase(s) that can modify 5mC in  
450 the *Drosophila* genome. The existence of additional enzyme(s) contributing to mRNA  
451 hydroxymethylation has also been postulated in mouse ESCs [16].

452 Our mass spectrometry findings and the results from our hMeRIP-seq experiments on larval  
453 brain fractions (LBF) and embryos are consistent with what has been previously reported for  
454 *Drosophila* tissue culture cells and for ESCs (Fig. 1,4,5 and S1, S3) [16]. We identified  $\sim 3000$   
455 5hmC peaks in  $\sim 1500$  transcripts in S2 cells [6]. In ESCs the number of peaks was 1633 in 795

456 transcripts [16]. In our *in vivo* experiments we identified 1815 peaks in 1402 transcripts in  
457 embryos, and 3711 peaks on 1776 transcripts in LBF. Of the modified transcripts in embryos  
458 37% were also identified as modified transcripts in the LBF. In all samples the modification  
459 peaks centered around a UC-rich consensus motif (Fig. S3). The consistency of the mapping  
460 results of the 5hmC modifications in *Drosophila* tissue culture cells, embryos, larval brain  
461 fraction, and ESCs underlines the probable conserved function of Tet across the species.

462 The 5hmC peaks on mRNAs derived from LBF are distributed all along the transcripts, the  
463 UTRs, the coding region, and introns. However, in *Tet<sup>null</sup>* LBF peaks in the CDS and introns are  
464 significantly more strongly reduced than peaks in the UTRs (Fig. 5C). This observation suggests  
465 that Tet may target coding sequences and introns specifically. We do not yet understand if  
466 modifications in different parts of the transcripts have diverse functions and if they may be  
467 controlled by additional enzyme(s).

468

## 469 ***Drosophila* Tet's DNA binding activity**

470 We found that in both embryos and in LBFs, Tet recognizes a DNA motif similar to the motif  
471 bound by Tet1 in vertebrate ESCs (Fig. S2C) [17, 25]. A majority of these peaks are associated  
472 with coding regions and are frequently found at the promoter. Almost 50% of the peaks overlap  
473 with the H3K4me3 mark, an indication that the genes are actively transcribed. The distribution of  
474 Tet-binding peaks and the overlap with the H3K4me3 mark agree well with the localization of  
475 the Tet-DNA-binding domain on salivary gland chromosomes confirming that the binding sites  
476 are found almost exclusively in euchromatin and are distributed on all 4 chromosomes (Fig.  
477 S2A).

478 We propose that the selection of target RNAs modified by Tet is at least in part facilitated by  
479 Tet's DNA-binding of specific genes. The concurrence of Tet-DNA binding peaks on genes that  
480 also showed Tet-dependent 5hmC modifications of their mRNA is consistent with this idea. The

481 majority of the genes that show Tet binding and modified mRNAs are divergent in both tissues  
482 indicating that in addition to a conserved function of Tet in different neuronal cells, Tet also has  
483 a tissue-specific or possibly even cell-type-specific function.

484

## 485 **Identifying Tet target mRNAs**

486 Tet is highly expressed in nervous tissues and the loss of Tet function leads to abnormal  
487 neuronal functions such as defects in larval locomotion or abnormalities in the circadian rhythm.  
488 [10] Our immunoprecipitation of 5hmrC-modified RNAs identified 1775 genes in larval brain  
489 fractions. 45 % (798) showed a significant decrease in the overall 5hmrC peaks in a *Tet<sup>null</sup>*  
490 background. Of the genes with reduced 5hmrC marks, 44% showed Tet-DNA binding. Notably,  
491 the mRNAs in which the reduction of the 5hmrC mark was seen were mostly associated with  
492 genes that function in different aspects of nerve cell development. First among them are axon  
493 outgrowth genes that were also identified in the GO-term analysis as abundant gene categories  
494 associated with Tet binding sites and mRNAs carrying the 5hmrC mark (Fig. 6D, S5).

495 Our initial examination of the developing embryonic ventral nerve cord (VNC) in *Tet* mutants  
496 identified subtle defects in CNS patterning. We then examined subsets of VNC neurons using  
497 antibodies to Fas2 and Connectin (Fig 7B, B' and S7B, B') guided by our molecular results.  
498 Overall commissural structure is maintained in *Tet<sup>null</sup>* embryos, however neurons expressing  
499 Fas2 show a failure of the midline to repel axon crossing effectively. And so, we looked among  
500 the Tet mRNA targets with known functions in axon guidance and found that both *slit* and *robo2*  
501 mRNAs were represented. Both genes have Tet-binding sites near the TSS, their mRNA is  
502 modified, and the modification is reduced in *Tet<sup>null</sup>* LBF, while their mRNA levels are not  
503 significantly changed (Fig. S7). Comparison of the CNS in *Tet<sup>null</sup>* and *robo2<sup>null</sup>* embryos identified  
504 a set of overlapping phenotypes with high frequency midline crossing defects of Fas2+ neurons,  
505 as well as discontinuities in the most lateral, longitudinal Fas2 and Connectin axonal tracts (for

506 description of embryonic nerve cord see [20]). Notably, these tracts correspond to neurons  
507 which express the Robo2 protein [26, 27].

508 The overlapping phenotypes of Tet, *robo2* and *slit*, together with the molecular data that  
509 identified Robo2 and Slit as Tet targets, prompted us to investigate if Robo2 and Slit protein  
510 expression was affected by the loss of Tet. Indeed, in Western blots from *Tet<sup>null</sup>* larval brain  
511 extracts both Robo2 and Slit protein levels were strongly reduced (Fig. 7F, F'), indicating that  
512 Tet's profound consequences on VNC patterning occurs, at least in part through the control of  
513 expression of the Robo2 and Slit proteins. As Robo2 and slit mRNA levels are not changed in  
514 *Tet<sup>null</sup>* LBF (Fig. S9), we suggest that the Tet-dependent 5hmC modification positively controls  
515 the level of translation of the two mRNAs. While we have not investigated the protein levels of  
516 additional Tet-targets, we expect that Tet controls protein levels through the 5hmC modification  
517 of many target mRNAs. Which step in RNA processing leading to mRNA translation is affected  
518 in *Tet<sup>null</sup>* animals will have to be elaborated. Based on our previous results, that showed that  
519 5hmC modified RNAs are found on polysomes, at least one possibility is that the 5hmC  
520 modification facilitates the loading of the mRNAs on ribosomes [6].

521 Our work supports a function of Tet in controlling the 5hmC modification of specific neuronal  
522 mRNAs, essential for maintaining translation levels necessary for normal neuronal function, thus  
523 adding an additional level of control of gene expression. However, we cannot exclude that Tet  
524 has additional functions in controlling gene expression in *Drosophila*.

525

## 526 **Materials and Methods**

### 527 **Drosophila Genetics**

528 All flies were reared at 25°C and kept on standard medium. The mutant Tet alleles are  
529 described in [6, 10]; the wild-type allele used in all experiments is *w<sup>1118</sup>*. The stock utilized to

530 examine Robo2 was robo2<sup>x123</sup>/CyO [28]. The material used for all whole-genome analysis was  
531 either hand dissected third instar larval brains, or, because some experiments necessitated a  
532 large input, dissected anterior parts of larvae including the 3 anterior abdominal segments that  
533 contain the brain besides other tissues such as imaginal discs, salivary glands, mouth parts and  
534 epidermis. Because Tet is highly expressed in the brain and the nerve cell in discs, but not in  
535 the other tissues, we call this the Larval Brain Fraction, LBF. Brains and larvae from wt and Tet-  
536 GFP third instar larvae were dissected in cold-PBS supplemented with protease inhibitor, snap  
537 frozen on dry ice, and stored at -80°C.

538

## 539 **Immunohistochemistry and Imaging**

540 The following antibodies were used for immunolabelling of late stage embryos and  
541 chromosomal preparations: mouse anti-Fas2 (Developmental Studies Hybridoma Bank, DSHB),  
542 rabbit anti-HRP (Jackson Immunoresearch), mouse anti-Connectin (DSHB), rabbit anti-dsRED  
543 (Invitrogen), rabbit and mouse anti-GFP (Invitrogen), mouse anti-H3K4me3 (Invitrogen).  
544 Secondary antibodies were purchased from Invitrogen. DNA was labeled with DAPI  
545 (Invitrogen). Embryos were collected and fixed via a formaldehyde/MeOH method [10]. Polytene  
546 chromosome preparations and staining were performed as in Karachentsev *et al.* [29]. Images  
547 of the ventral nerve cord were obtained using a Leica SP8 using a 40x Objective. Fas2 and  
548 HRP labeled embryos were imaged and typically contained 8-10 hemisegments. Hemisegments  
549 were examined for midline crossing and in some instances the presence or integrity of the most  
550 lateral Fas2+ longitudinal track. Similar imaging and analysis were performed on  
551 Connectin/HRP labeled embryos.

552

## 553 **LC-MS/MS for 5mC and 5hmC detection and quantification**

554 Mass spectrometry analysis was performed as described previously [30]. Briefly, 3  $\mu\text{L}$  of 10 $\times$   
555 buffer (500 mM Tris-HCl, 100 mM NaCl, 10 mM  $\text{MgCl}_2$ , 10 mM  $\text{ZnSO}_4$ , pH 7.0), 2  $\mu\text{L}$  (180 units)  
556 of S1 nuclease, 2  $\mu\text{L}$  (0.001 units) of venom phosphodiesterase I and 1  $\mu\text{L}$  (30 units) of CAIP  
557 were added to 1  $\mu\text{g}$  of mRNA from *Drosophila* wild type and Tet-deficient larval brains,  
558 respectively (in 22  $\mu\text{L}$  of  $\text{H}_2\text{O}$ ). The mixture (30  $\mu\text{L}$ ) was incubated at 37°C for 4 h. The resulting  
559 solution was three times extracted with chloroform. The upper aqueous phase was collected  
560 and passed through a solid phase extraction cartridge filled with 50 mg of sorbent of graphitized  
561 carbon black to remove the salts. The eluate was then dried with nitrogen at 37°C for  
562 subsequent chemical labeling and LC-ESI-MS/MS analysis by an AB 3200 QTRAP mass  
563 spectrometer (Applied Biosystems, Foster City, CA, USA).

564

## 565 **Embryo and Larval Tet ChIP-seq**

566 0-12h embryos were collected, processed, and chromatin was prepared according to Yad *et*  
567 *al.* [31], except lysates were sonicated on a Covaris S2 sonication device (intensity 8, duty cycle  
568 20%, cycle burst 200) for 30 minutes at 4°C to reach fragments ranging from 150–500 bp and  
569 then centrifuged at 20,000g at 4°C for 1 minute. Supernatants were collected and centrifuged  
570 again for 15 minute to remove debris. Chromatin samples were then snap frozen in dry ice and  
571 stored at -80°C until immunoprecipitation in triplicates. All buffers contained cOmplete EDTA-  
572 free protease inhibitor cocktail (Roche).

573 For the larval brain fraction (LBF), 300 frozen larval heads were thawed on ice and 1 ml of  
574 NU-1 buffer (5 mM HEPES-KOH pH 7.9, 5 mM  $\text{MgCl}_2$ , 0.1 mM EDTA pH 8.0, 0.5 mM EGTA pH  
575 8.0, 350 mM sucrose, 1mM DTT). 1% formaldehyde was added to NU-1 buffer before use.  
576 Samples were homogenized immediately at room temperature using Dounce with a loose pestle  
577 30 times without foaming for 15 minutes. Samples were filtered first through BD Falcon Cell

578 Strainer 70  $\mu\text{m}$  (Cat No.352350) followed by 50  $\mu\text{m}$  Falcon (Cat No. 340603). Samples were  
579 quenched with freshly prepared 125 mM glycine incubated for 5 minutes at room temperature  
580 on a shaker and transferred to ice for 5 minutes. Samples were centrifuged at 4000 g at 4°C for  
581 5 minutes. The pellet was washed twice with 1 ml cold PBS and resuspended in 350  $\mu\text{l}$  chilled  
582 sonication buffer (50mM HEPES-KOH pH 7.9, 140 mM NaCl, 1mM EDTA pH 8.0, 1% Triton X-  
583 100, 0.1% sodium deoxycholate, 1% SDS) and incubated for 20 minutes at 4°C. Lysates were  
584 sonicated as described above and chromatin was stored at - 80°C until immunoprecipitation.  
585

## 586 **Chromatin Immunoprecipitation**

587 Chromatin samples were thawed on ice and pre-cleared for 15 minutes by rotation in 25  $\mu\text{l}$  of  
588 pre-washed binding control magnetic agarose beads (Chromotek). Chromatin was diluted ten-  
589 fold in sonication buffer without SDS. 1% of the diluted lysate was recovered and used as input.  
590 Diluted chromatin was incubated with 25  $\mu\text{l}$  of pre-washed GFP-Trap MA beads (Chromotek)  
591 and rotated at 4°C overnight. Lysates were washed on magnetic stand with 1 ml each low salt  
592 RIPA buffer (140 mM NaCl, 1mM EDTA pH 8.0, 1% Triton X-100, 0.1% sodium deoxycholate,  
593 10mM Tris-HCl pH 8.0 ) (5 times), high salt RIPA buffer (500 mM NaCl, 1mM EDTA pH 8.0, 1%  
594 Triton X-100, 0.1% sodium deoxycholate, 10mM Tris-HCl pH 8.0 ) (2 times), LiCl buffer (250mM  
595 LiCl, 1mM EDTA pH 8.0, 0.5% IGEPAL CA-630, 0.5% sodium deoxycholate, 10mM Tris-HCl  
596 pH 8.0) (1 time), TE buffer (10mM Tris-HCl pH 8.0, 1mM EDTA pH 8.0 ) (1 time). All buffers  
597 contained cOmplete EDTA-free protease inhibitor cocktail (Roche).

598 ChIP DNA was eluted by shaking 2 hours at 37°C with 100  $\mu\text{l}$  of elution buffer (1% SDS,  
599 50mM NaHCO<sub>3</sub>, 10 $\mu\text{g}/\text{ml}$  RNaseA), then 4 hours with 0.2 $\mu\text{g}/\text{ml}$  proteinase K. Beads were  
600 concentrated on magnet and elute was recovered. Samples were de-crosslinked overnight at  
601 65°C. Inputs were processed like ChIP samples. DNA was purified by

602 phenol/chloroform/isoamyl alcohol followed by SPRI select beads (Beckman Coulter) and DNA  
603 concentration was measured with Qubit fluorometer (Thermo Fisher).

604

## 605 **Embryo Tet ChIP-seq library preparation and sequencing**

606 NGS Libraries were made from eluted DNA using the NEBNext Ultra II DNA Library Prep kit  
607 (New England Biolabs) according to the manufacturer's protocol. Briefly, 20 ng of DNA  
608 fragments were end-repaired and the blunt, phosphorylated ends were treated with Klenow  
609 DNA polymerase and dATP to yield a 3' A base overhang for ligation of Illumina adapters. After  
610 adapter ligation, DNA was PCR amplified with indexed primer for 12 cycles. Libraries were size-  
611 selected using Ampure XP beads (Beckman Coulter) to remove adapter dimers. DNA was  
612 quantified by fluorometry with the Qubit 2.0 (Thermo Scientific) and DNA integrity was assessed  
613 with a Fragment Analyzer (Agilent). The libraries were pooled and sequenced on the NextSeq  
614 500 platform using 75 bp single end sequencing according to manufacturer's protocol using  
615 Reagent v.2.5 at the Waksman Institute Genomics Core. Coverage ranged from 30 million to 60  
616 million tags per ChIP-seq sample.

617

## 618 **Larva Tet ChIP-seq library preparation and sequencing**

619 ACCEL-NGS® 1S plus DNA library kit was used to prepare indexed libraries from IP and  
620 input DNA. Libraries were pooled respecting equimolarity. Sequencing was performed on  
621 Illumina MiSeq sequencer in 150 bp paired-end reads.

622

## 623 **Embryo Tet ChIP-seq data analysis**

624 Raw reads were trimmed using cutadapt v2.0 [32] to remove adapter and low-quality reads.  
625 The processed reads were mapped to the *Drosophila melanogaster* BDGP6 (dm6) reference



626 genome from Ensembl release 88 using the BWA version 0.7.5-r404 for Chip-seq [33]. For  
627 analysis, only unique reads with mapping quality >20 were accepted. Further, redundant reads  
628 with identical coordinates were filtered out. Aligned reads were processed by Model-based  
629 Analysis of Chip-seq (MACS2) [34] using Input Chip DNA as control. For peak calling the  
630 MACS2 'callpeak' function was used (-p 1e-2 -g 1.2e+08 -B --nomodel --ext size 147 --SPMR)  
631 for each replicate vs. control input. Peaks were selected using the following criteria: p-value  
632 <10e-5, fold enrichment over control greater than 10 and a minimal number of reads higher than  
633 50. Bedtools (version v2.24.0) [35] was used to identify overlapping peaks in replicates. A  
634 sliding window of 50, 100, 150, 200, 250 and 300 bp around the peak summit (base position of  
635 maximum enrichment) was used to determine best range for overlapping peaks. The number of  
636 overlapping peaks saturated around window size of 250 bp. Thus, for downstream analysis,  
637 windows size of 250 bp was used to identify overlapping peaks in replicates. The Integrated  
638 Genomics Viewer (IGV) [36] was used for visualization of Chip-seq data sets. For visualization  
639 in IGV, bigwig peak files were generated using "bdgcmp" function in MACS2 with option "-m  
640 logFE -p 0.00001". Peaks were annotated using the "annotatePeaks.pl" feature of HomerTools  
641 [37] with default settings and gtf was obtained from of Ensembl dm6 release 88. De novo motif  
642 discovery was carried out on all intersecting peaks of Tet Chip-seq. DNA sequences (FASTA)  
643 were generated from chromosome coordinates produced by peak detection and windowing  
644 using the BEDTools. De novo motif analysis was performed using MEME-ChIP [38]. Gene  
645 ontology (GO) analysis was done using Database for Annotation, Visualization and Integrated  
646 Discovery (DAVID) [39, 40]. Binding profile within gene body was generated using deepTools2  
647 with computeMatrix and plotProfile functions [41].

648

## 649 **H3K4me3 ChIP-seq public datasets and analysis**

650 Embryo and larva H3K4me3 ChIP-seq data were obtained from the modENCODE project  
651 (GEO: GSE16013) [42]. The analysis was carried out from raw data following the same  
652 approach described for Tet ChIP-seq. The overlapping of Tet-ChIP seq peaks and H3K4me3  
653 was computed using BEDTools [35].

654

## 655 **Larva Tet ChIP-seq data analysis**

656 Tet-Chip sequencing data were pre-processed using the following steps: the raw sequencing  
657 data were first analysed with FastQC (Andrews, 2010,  
658 <https://www.bioinformatics.babraham.ac.uk/projects/fastqc/>). Low-complexity reads were  
659 removed with the AfterQC tool [43] with default parameters and Trimmomatic [44] with default  
660 parameters was used to remove adapter sequences. The resulting fastq data were again  
661 analysed with FastQC to ensure that no further processing was needed. Pre-processed reads  
662 were then mapped against the *Drosophila* reference genome (BDGP6.28) with the bowtie2  
663 algorithm [45] using the ensembl reference transcriptome (version 100). Tet-binding peak  
664 regions were identified by applying the MACS2 peak-calling tool [34] to immunoprecipitated (IP)  
665 samples, using their input counterpart to estimate background noise (q-value < 0.05). It is worth  
666 noting that the “expected genome size” MACS2 parameter was set as the *Drosophila* genome  
667 length excluding ‘N’ bases (*i.e.*, 142 573 024 bp), and summit positions were identified using the  
668 MACS2 “-call-summits” option. To avoid identifying extremely large peak regions, the peaks  
669 were resized to 100 bp on both sides of the identified summit. Binding profile within gene body  
670 was generated using deepTools2 with computeMatrix and plotProfile functions [41].

671

672 **HydroxyMethylated RNA Immunoprecipitation sequencing (hMeRIP-**  
673 **seq)**

674 0-12h embryos were collected, immediately frozen on dry ice, and stored at -80°C until RNA  
675 purification. The larval brain fraction (LBF), was dissected, immediately frozen on dry ice, and  
676 stored at -80°C until RNA isolation. The RNA immunoprecipitation was performed essentially as  
677 described in Dominissi *et al.* [46]. Briefly, total RNA was isolated using RNeasy Maxi Kit  
678 (Qiagen). For each sample 1 mg of total RNA (1 µg/µl) was divided into batches of 45µg and  
679 incubated at 94°C in fragmentation buffer (100 mM Tris-HCl pH7.0, 100 mM ZnCl<sub>2</sub>) for 40  
680 seconds. Fragmented RNA batches were pooled, and ethanol precipitated at -80°C overnight.  
681 RNA samples were washed with 75% ethanol and resuspended in RNase-free water.  
682 Fragmentation efficiency was checked on a Bioanalyzer RNA chip (Agilent). RNA fragments  
683 were denatured by heating at 70°C for 5 minutes, then chilled on ice for 5 minutes. For  
684 immunoprecipitation, RNA samples were incubated overnight at 4°C with 12.5 µg of anti-5-hmC  
685 antibody (Diagenode rat monoclonal MAb-633HMC) or without antibody as negative control in  
686 IP buffer (750 mM NaCl, 50 mM Tris-HCl pH7.4, 0.5% IGEPAL CA-630, RNasin 400 U/ml and  
687 RVC 2 mM). 60 µl of equilibrated Dynabeads Protein G (Life Technologies) were added to the  
688 samples and incubated at 4°C for 2.5 hours. The magnetic stand beads were washed with 1 ml  
689 IP buffer for 5 minutes three times. To elute immunoprecipitated RNA, 1 ml TriPure Reagent  
690 (Roche) was added, mixed thoroughly, and centrifuged at room temperature for 5 minutes.  
691 Aqueous phase was recovered, and equal amount of chloroform was added, vortexed and  
692 aqueous phase was collected after centrifugation and ethanol precipitated at -80°C overnight.  
693 RNA was resuspended in nuclease free water and used for library preparation. All buffers  
694 contained cOmplete EDTA-free protease inhibitor cocktail (Roche).

695

## 696 **hMeRIP-seq library preparation and sequencing**

697 Library preparation was done with the TruSeq ChIP Sample Prep Kit (Illumina) after reverse  
698 transcription of pulled-down RNA and synthesis of a second strand (NEB) by Next mRNA  
699 second strand synthesis module (NEB)). Briefly, 5 to 10 ng dsDNA was subjected to 5' and 3'  
700 protruding end repair. Then, non-templated adenines were added to the 3' ends of the blunted  
701 DNA fragments. This last step allows ligation of Illumina multiplex adapters. The DNA fragments  
702 were then size selected in order to remove all unligated adapters and to sequence 200-300-bp  
703 fragments. 18 cycles of PCR were carried out to amplify the library. DNA was quantified by  
704 fluorometry with the Qubit 2.0 and DNA integrity was assessed with a 2100 bioanalyzer  
705 (Agilent). 6 pM of DNA library spiked with .5% PhiX viral DNA was clustered on cBot (Illumina)  
706 and then sequenced on a HiScanSQ module (Illumina).

707

## 708 **hMeRIP-seq data analysis**

709 The processed reads were mapped to the reference genome *Drosophila melanogaster*  
710 BDGP6 (dm6) from Ensembl by using Hisat2 (version 2.1.0) for RNA seq and hMeRIP seq [47].  
711 To analyze gene expression, HTSeq framework, version 0.5.3p9, was used to count the aligned  
712 reads in genes [48]. Mode “union” and mapping quality cut-off 20 were used for our analysis.  
713 Count-table was normalized so that all samples have the same level of total mapped  
714 reads. DEseq2 was used to identify differentially expressed genes [49]. Cufflinks v2.2.1 was  
715 applied to calculate the rpkm values [50, 51]. A gene was considered as significantly changed  
716 when fold change  $\geq 2$  or  $\leq -2$  and adjusted p value  $< 0.05$ . “SplitNCigarReads” function in  
717 GATK (version 3.3-0) (<https://gatk.broadinstitute.org/>) were used to split reads that contain Ns in  
718 their cigar string (e.g., spanning splicing events in hMeRIP-seq data). “rmdup” function of  
719 samtools (version 1.3.1) were used to remove a duplicate mapping of reads. Then the same  
720 peak calling procedure as ChIP seq data analysis was performed to call peaks of hMeRIP-seq

721 data. The peaks of hMeRIP-seq were selected using P-value < 10e-5. Peaks of hMeRIP-seq  
722 were considered as reduced when the normalized hMeRIP-seq signal in control samples was at  
723 least 1.4-fold change higher than the signal in Tet depleted samples. The fold change and P-  
724 value were calculated using “limma” package in R [52].

725

## 726 **Western blot**

727 One hundred third instar larval brains from wild type or *Tet<sup>null</sup>* were dissected and  
728 immediately frozen on dry ice. Total protein was isolated from these brains using RIPA buffer  
729 and 75 ug of the total protein was loaded to each well. Slit antibody (DSHB, C555.6D, Spyros  
730 Artavanis-Tsakonas) was used at 1: 200 dilution and Robo2 antibody [53] was used at 1: 1000  
731 dilution. The western blot signals were detected using IRDye 800CW Infrared Dyes conjugated  
732 secondary antibody in LICOR Odyssey CLx imaging system. Signals were quantified using  
733 LICOR Image Studio Lite software. See Figure S8 for unprocessed western blot exposure.

734

## 735 **Statistical information**

736 Statistical analysis was performed using R or GraphPad Prism 9. Statistics were performed  
737 using Student’s t-test or chi-square test unless otherwise specified. Error bars are presented as  
738 SEM. P-value < 0.05 is the cut-off for statistical significance.

739

## 740 **Data availability**

741 The sequencing data that support the finding of this study are available at NCBI Gene  
742 Expression Omnibus (GEO) with the accession number GSE225980 and accessible token  
743 “ihmzwuocfrybdal”.

744

## 745 **Acknowledgements**

746 We thank Cordelia Rauskolb, Bryce Nickels, and Michael Verzi for helpful comments on the  
747 manuscript, Premal Shah, John Favate, and Shun Liang for discussions and suggestions, and  
748 Benjamin Rogers-Boehme for help with Figures. We also thank Barry Dickson for anti-Robo2  
749 antibodies and Le Nguyen for expert fly food preparation and stock maintenance. Stocks  
750 obtained from the Bloomington Drosophila Stock Center (NIHP40OD018537) were used in this  
751 study. The imaging was done at the Waksman Institute Shared Imaging Facility, Rutgers  
752 University.  
753

## 754 **References**

- 755 1. Roundtree IA, Evans ME, Pan T, He C. Dynamic RNA Modifications in Gene Expression  
756 Regulation. *Cell*. 2017;169(7):1187-200. doi: 10.1016/j.cell.2017.05.045. PubMed PMID:  
757 28622506; PubMed Central PMCID: PMC5657247.
- 758 2. Boccaletto P, Stefaniak F, Ray A, Cappannini A, Mukherjee S, Purta E, et al.  
759 MODOMICS: a database of RNA modification pathways. 2021 update. *Nucleic Acids Res.*  
760 2022;50(D1):D231-D5. doi: 10.1093/nar/gkab1083. PubMed PMID: 34893873; PubMed  
761 Central PMCID: PMC5657247.
- 762 3. Schaefer MR. The Regulation of RNA Modification Systems: The Next Frontier in  
763 Epitranscriptomics? *Genes (Basel)*. 2021;12(3). Epub 20210226. doi:  
764 10.3390/genes12030345. PubMed PMID: 33652758; PubMed Central PMCID:  
765 PMC5657247.
- 766 4. Gao Y, Fang J. RNA 5-methylcytosine modification and its emerging role as an  
767 epitranscriptomic mark. *RNA Biol*. 2021;18(sup1):117-27. Epub 20210721. doi:  
768 10.1080/15476286.2021.1950993. PubMed PMID: 34288807; PubMed Central PMCID:  
769 PMC5657247.
- 770 5. Boffelli D, Takayama S, Martin DI. Now you see it: genome methylation makes a  
771 comeback in *Drosophila*. *Bioessays*. 2014;36(12):1138-44. Epub 20140912. doi:  
772 10.1002/bies.201400097. PubMed PMID: 25220261.
- 773 6. Delatte B, Wang F, Ngoc LV, Collignon E, Bonvin E, Deplus R, et al. RNA biochemistry.  
774 Transcriptome-wide distribution and function of RNA hydroxymethylcytosine. *Science*.  
775 2016;351(6270):282-5. Epub 2016/01/28. doi: 10.1126/science.aac5253. PubMed PMID:  
776 26816380.
- 777 7. Tahiliani M, Koh KP, Shen Y, Pastor WA, Bandukwala H, Brudno Y, et al. Conversion of  
778 5-methylcytosine to 5-hydroxymethylcytosine in mammalian DNA by MLL partner TET1.

- 779 Science. 2009;324(5929):930-5. Epub 20090416. doi: 10.1126/science.1170116. PubMed  
780 PMID: 19372391; PubMed Central PMCID: PMCPMC2715015.
- 781 8. Fu L, Guerrero CR, Zhong N, Amato NJ, Liu Y, Liu S, et al. Tet-mediated formation of 5-  
782 hydroxymethylcytosine in RNA. *J Am Chem Soc.* 2014;136(33):11582-5. Epub 20140807.  
783 doi: 10.1021/ja505305z. PubMed PMID: 25073028; PubMed Central PMCID:  
784 PMCPMC4140497.
- 785 9. Tan L, Shi YG. Tet family proteins and 5-hydroxymethylcytosine in development and  
786 disease. *Development.* 2012;139(11):1895-902. doi: 10.1242/dev.070771. PubMed PMID:  
787 22569552; PubMed Central PMCID: PMCPMC3347683.
- 788 10. Wang F, Minakhina S, Tran H, Changela N, Kramer J, Steward R. Tet protein function  
789 during *Drosophila* development. *PLoS One.* 2018;13(1):e0190367. Epub 20180111. doi:  
790 10.1371/journal.pone.0190367. PubMed PMID: 29324752; PubMed Central PMCID:  
791 PMCPMC5764297.
- 792 11. Dunwell TL, McGuffin LJ, Dunwell JM, Pfeifer GP. The mysterious presence of a 5-  
793 methylcytosine oxidase in the *Drosophila* genome: possible explanations. *Cell Cycle.*  
794 2013;12(21):3357-65. Epub 20130919. doi: 10.4161/cc.26540. PubMed PMID: 24091536;  
795 PubMed Central PMCID: PMCPMC3895424.
- 796 12. Zhang G, Huang H, Liu D, Cheng Y, Liu X, Zhang W, et al. N6-methyladenine DNA  
797 modification in *Drosophila*. *Cell.* 2015;161(4):893-906. Epub 20150430. doi:  
798 10.1016/j.cell.2015.04.018. PubMed PMID: 25936838.
- 799 13. Ismail JN, Badini S, Frey F, Abou-Kheir W, Shirinian M. *Drosophila* Tet Is Expressed in  
800 Midline Glia and Is Required for Proper Axonal Development. *Front Cell Neurosci.*  
801 2019;13:252. Epub 20190604. doi: 10.3389/fncel.2019.00252. PubMed PMID: 31213988;  
802 PubMed Central PMCID: PMCPMC6558204.



- 803 14. Shen Q, Zhang Q, Shi Y, Shi Q, Jiang Y, Gu Y, et al. Tet2 promotes pathogen infection-  
804 induced myelopoiesis through mRNA oxidation. *Nature*. 2018;554(7690):123-7. Epub  
805 20180124. doi: 10.1038/nature25434. PubMed PMID: 29364877.
- 806 15. Guallar D, Bi X, Pardavila JA, Huang X, Saenz C, Shi X, et al. RNA-dependent chromatin  
807 targeting of TET2 for endogenous retrovirus control in pluripotent stem cells. *Nat Genet*.  
808 2018;50(3):443-51. Epub 20180226. doi: 10.1038/s41588-018-0060-9. PubMed PMID:  
809 29483655; PubMed Central PMCID: PMC5862756.
- 810 16. Lan J, Rajan N, Bizet M, Penning A, Singh NK, Guallar D, et al. Functional role of Tet-  
811 mediated RNA hydroxymethylcytosine in mouse ES cells and during differentiation. *Nat*  
812 *Commun*. 2020;11(1):4956. Epub 20201002. doi: 10.1038/s41467-020-18729-6. PubMed  
813 PMID: 33009383; PubMed Central PMCID: PMC5862756.
- 814 17. Wu H, D'Alessio AC, Ito S, Xia K, Wang Z, Cui K, et al. Dual functions of Tet1 in  
815 transcriptional regulation in mouse embryonic stem cells. *Nature*. 2011;473(7347):389-93.  
816 Epub 20110330. doi: 10.1038/nature09934. PubMed PMID: 21451524; PubMed Central  
817 PMCID: PMC3539771.
- 818 18. Jones PA, Liang G. Rethinking how DNA methylation patterns are maintained. *Nat Rev*  
819 *Genet*. 2009;10(11):805-11. Epub 20090930. doi: 10.1038/nrg2651. PubMed PMID:  
820 19789556; PubMed Central PMCID: PMC2848124.
- 821 19. Blockus H, Chedotal A. Slit-Robo signaling. *Development*. 2016;143(17):3037-44. doi:  
822 10.1242/dev.132829. PubMed PMID: 27578174.
- 823 20. Simpson JH, Kidd T, Bland KS, Goodman CS. Short-range and long-range guidance by  
824 slit and its Robo receptors. Robo and Robo2 play distinct roles in midline guidance.  
825 *Neuron*. 2000;28(3):753-66. doi: 10.1016/s0896-6273(00)00151-3. PubMed PMID:  
826 11163264.
- 827 21. Evans TA, Santiago C, Arbeille E, Bashaw GJ. Robo2 acts in trans to inhibit Slit-Robo1  
828 repulsion in pre-crossing commissural axons. *Elife*. 2015;4:e08407. Epub 20150717. doi:

- 829 10.7554/eLife.08407. PubMed PMID: 26186094; PubMed Central PMCID:  
830 PMCPMC4505356.
- 831 22. Beck DB, Petracovici A, He C, Moore HW, Louie RJ, Ansar M, et al. Delineation of a  
832 Human Mendelian Disorder of the DNA Demethylation Machinery: TET3 Deficiency. *Am J*  
833 *Hum Genet.* 2020;106(2):234-45. Epub 20200109. doi: 10.1016/j.ajhg.2019.12.007.  
834 PubMed PMID: 31928709; PubMed Central PMCID: PMCPMC7010978.
- 835 23. Gorla M, Bashaw GJ. Molecular mechanisms regulating axon responsiveness at the  
836 midline. *Dev Biol.* 2020;466(1-2):12-21. Epub 20200817. doi:  
837 10.1016/j.ydbio.2020.08.006. PubMed PMID: 32818516; PubMed Central PMCID:  
838 PMCPMC8447865.
- 839 24. Dominissini D, Moshitch-Moshkovitz S, Schwartz S, Salmon-Divon M, Ungar L, Osenberg  
840 S, et al. Topology of the human and mouse m6A RNA methylomes revealed by m6A-seq.  
841 *Nature.* 2012;485(7397):201-6. Epub 20120429. doi: 10.1038/nature11112. PubMed  
842 PMID: 22575960.
- 843 25. Yao B, Li Y, Wang Z, Chen L, Poidevin M, Zhang C, et al. Active N(6)-Methyladenine  
844 Demethylation by DMAD Regulates Gene Expression by Coordinating with Polycomb  
845 Protein in Neurons. *Mol Cell.* 2018;71(5):848-57 e6. Epub 20180802. doi:  
846 10.1016/j.molcel.2018.07.005. PubMed PMID: 30078725; PubMed Central PMCID:  
847 PMCPMC6136845.
- 848 26. Simpson JH, Bland KS, Fetter RD, Goodman CS. Short-range and long-range guidance  
849 by Slit and its Robo receptors: a combinatorial code of Robo receptors controls lateral  
850 position. *Cell.* 2000;103(7):1019-32. doi: 10.1016/s0092-8674(00)00206-3. PubMed  
851 PMID: 11163179.
- 852 27. Spitzweck B, Brankatschk M, Dickson BJ. Distinct protein domains and expression  
853 patterns confer divergent axon guidance functions for *Drosophila* Robo receptors. *Cell.*  
854 2010;140(3):409-20. doi: 10.1016/j.cell.2010.01.002. PubMed PMID: 20144763.

- 855 28. Santiago-Martinez E, Soplop NH, Kramer SG. Lateral positioning at the dorsal midline: Slit  
856 and Roundabout receptors guide *Drosophila* heart cell migration. *Proc Natl Acad Sci U S*  
857 *A.* 2006;103(33):12441-6. Epub 20060803. doi: 10.1073/pnas.0605284103. PubMed  
858 PMID: 16888037; PubMed Central PMCID: PMCPMC1567898.
- 859 29. Karachentsev D, Sarma K, Reinberg D, Steward R. PR-Set7-dependent methylation of  
860 histone H4 Lys 20 functions in repression of gene expression and is essential for mitosis.  
861 *Genes Dev.* 2005;19(4):431-5. Epub 20050128. doi: 10.1101/gad.1263005. PubMed  
862 PMID: 15681608; PubMed Central PMCID: PMCPMC548943.
- 863 30. Huang W, Lan MD, Qi CB, Zheng SJ, Wei SZ, Yuan BF, et al. Formation and  
864 determination of the oxidation products of 5-methylcytosine in RNA. *Chem Sci.*  
865 2016;7(8):5495-502. Epub 20160511. doi: 10.1039/c6sc01589a. PubMed PMID:  
866 30034689; PubMed Central PMCID: PMCPMC6021781.
- 867 31. Ghavi-Helm Y, Zhao B, Furlong EE. Chromatin Immunoprecipitation for Analyzing  
868 Transcription Factor Binding and Histone Modifications in *Drosophila*. *Methods Mol Biol.*  
869 2016;1478:263-77. doi: 10.1007/978-1-4939-6371-3\_16. PubMed PMID: 27730588.
- 870 32. Martin M. Cutadapt removes adapter sequences from high-throughput sequencing reads.  
871 2011. 2011;17(1):3. Epub 2011-08-02. doi: 10.14806/ej.17.1.200.
- 872 33. Li H, Durbin R. Fast and accurate short read alignment with Burrows-Wheeler transform.  
873 *Bioinformatics.* 2009;25(14):1754-60. Epub 20090518. doi: 10.1093/bioinformatics/btp324.  
874 PubMed PMID: 19451168; PubMed Central PMCID: PMCPMC2705234.
- 875 34. Zhang Y, Liu T, Meyer CA, Eeckhoute J, Johnson DS, Bernstein BE, et al. Model-based  
876 analysis of ChIP-Seq (MACS). *Genome Biol.* 2008;9(9):R137. Epub 20080917. doi:  
877 10.1186/gb-2008-9-9-r137. PubMed PMID: 18798982; PubMed Central PMCID:  
878 PMCPMC2592715.

- 879 35. Quinlan AR, Hall IM. BEDTools: a flexible suite of utilities for comparing genomic features.  
880 Bioinformatics. 2010;26(6):841-2. Epub 20100128. doi: 10.1093/bioinformatics/btq033.  
881 PubMed PMID: 20110278; PubMed Central PMCID: PMCPMC2832824.
- 882 36. Robinson JT, Thorvaldsdottir H, Winckler W, Guttman M, Lander ES, Getz G, et al.  
883 Integrative genomics viewer. Nat Biotechnol. 2011;29(1):24-6. doi: 10.1038/nbt.1754.  
884 PubMed PMID: 21221095; PubMed Central PMCID: PMCPMC3346182.
- 885 37. Heinz S, Benner C, Spann N, Bertolino E, Lin YC, Laslo P, et al. Simple combinations of  
886 lineage-determining transcription factors prime cis-regulatory elements required for  
887 macrophage and B cell identities. Mol Cell. 2010;38(4):576-89. doi:  
888 10.1016/j.molcel.2010.05.004. PubMed PMID: 20513432; PubMed Central PMCID:  
889 PMCPMC2898526.
- 890 38. Machanick P, Bailey TL. MEME-ChIP: motif analysis of large DNA datasets.  
891 Bioinformatics. 2011;27(12):1696-7. Epub 20110412. doi: 10.1093/bioinformatics/btr189.  
892 PubMed PMID: 21486936; PubMed Central PMCID: PMCPMC3106185.
- 893 39. Huang da W, Sherman BT, Lempicki RA. Systematic and integrative analysis of large  
894 gene lists using DAVID bioinformatics resources. Nat Protoc. 2009;4(1):44-57. doi:  
895 10.1038/nprot.2008.211. PubMed PMID: 19131956.
- 896 40. Sherman BT, Hao M, Qiu J, Jiao X, Baseler MW, Lane HC, et al. DAVID: a web server for  
897 functional enrichment analysis and functional annotation of gene lists (2021 update).  
898 Nucleic Acids Res. 2022;50(W1):W216-21. Epub 20220323. doi: 10.1093/nar/gkac194.  
899 PubMed PMID: 35325185; PubMed Central PMCID: PMCPMC9252805.
- 900 41. Ramirez F, Ryan DP, Gruning B, Bhardwaj V, Kilpert F, Richter AS, et al. deepTools2: a  
901 next generation web server for deep-sequencing data analysis. Nucleic Acids Res.  
902 2016;44(W1):W160-5. Epub 20160413. doi: 10.1093/nar/gkw257. PubMed PMID:  
903 27079975; PubMed Central PMCID: PMCPMC4987876.

- 904 42. Negre N, Brown CD, Ma L, Bristow CA, Miller SW, Wagner U, et al. A cis-regulatory map  
905 of the *Drosophila* genome. *Nature*. 2011;471(7339):527-31. doi: 10.1038/nature09990.  
906 PubMed PMID: 21430782; PubMed Central PMCID: PMCPMC3179250.
- 907 43. Chen S, Huang T, Zhou Y, Han Y, Xu M, Gu J. AfterQC: automatic filtering, trimming,  
908 error removing and quality control for fastq data. *BMC Bioinformatics*. 2017;18(Suppl  
909 3):80. Epub 20170314. doi: 10.1186/s12859-017-1469-3. PubMed PMID: 28361673;  
910 PubMed Central PMCID: PMCPMC5374548.
- 911 44. Bolger AM, Lohse M, Usadel B. Trimmomatic: a flexible trimmer for Illumina sequence  
912 data. *Bioinformatics*. 2014;30(15):2114-20. Epub 20140401. doi:  
913 10.1093/bioinformatics/btu170. PubMed PMID: 24695404; PubMed Central PMCID:  
914 PMCPMC4103590.
- 915 45. Langmead B, Salzberg SL. Fast gapped-read alignment with Bowtie 2. *Nat Methods*.  
916 2012;9(4):357-9. Epub 20120304. doi: 10.1038/nmeth.1923. PubMed PMID: 22388286;  
917 PubMed Central PMCID: PMCPMC3322381.
- 918 46. Dominissini D, Moshitch-Moshkovitz S, Salmon-Divon M, Amariglio N, Rechavi G.  
919 Transcriptome-wide mapping of N(6)-methyladenosine by m(6)A-seq based on  
920 immunocapturing and massively parallel sequencing. *Nat Protoc*. 2013;8(1):176-89. Epub  
921 20130103. doi: 10.1038/nprot.2012.148. PubMed PMID: 23288318.
- 922 47. Kim D, Paggi JM, Park C, Bennett C, Salzberg SL. Graph-based genome alignment and  
923 genotyping with HISAT2 and HISAT-genotype. *Nat Biotechnol*. 2019;37(8):907-15. Epub  
924 20190802. doi: 10.1038/s41587-019-0201-4. PubMed PMID: 31375807; PubMed Central  
925 PMCID: PMCPMC7605509.
- 926 48. Anders S, Pyl PT, Huber W. HTSeq--a Python framework to work with high-throughput  
927 sequencing data. *Bioinformatics*. 2015;31(2):166-9. Epub 20140925. doi:  
928 10.1093/bioinformatics/btu638. PubMed PMID: 25260700; PubMed Central PMCID:  
929 PMCPMC4287950.

- 930 49. Love MI, Huber W, Anders S. Moderated estimation of fold change and dispersion for  
931 RNA-seq data with DESeq2. *Genome Biol.* 2014;15(12):550. doi: 10.1186/s13059-014-  
932 0550-8. PubMed PMID: 25516281; PubMed Central PMCID: PMC4302049.
- 933 50. Trapnell C, Williams BA, Pertea G, Mortazavi A, Kwan G, van Baren MJ, et al. Transcript  
934 assembly and quantification by RNA-Seq reveals unannotated transcripts and isoform  
935 switching during cell differentiation. *Nat Biotechnol.* 2010;28(5):511-5. Epub 20100502.  
936 doi: 10.1038/nbt.1621. PubMed PMID: 20436464; PubMed Central PMCID:  
937 PMC3146043.
- 938 51. Trapnell C, Hendrickson DG, Sauvageau M, Goff L, Rinn JL, Pachter L. Differential  
939 analysis of gene regulation at transcript resolution with RNA-seq. *Nat Biotechnol.*  
940 2013;31(1):46-53. Epub 20121209. doi: 10.1038/nbt.2450. PubMed PMID: 23222703;  
941 PubMed Central PMCID: PMC3869392.
- 942 52. Ritchie ME, Phipson B, Wu D, Hu Y, Law CW, Shi W, et al. limma powers differential  
943 expression analyses for RNA-sequencing and microarray studies. *Nucleic Acids Res.*  
944 2015;43(7):e47. Epub 20150120. doi: 10.1093/nar/gkv007. PubMed PMID: 25605792;  
945 PubMed Central PMCID: PMC4402510.
- 946 53. Rajagopalan S, Vivancos V, Nicolas E, Dickson BJ. Selecting a longitudinal pathway:  
947 Robo receptors specify the lateral position of axons in the *Drosophila* CNS. *Cell.*  
948 2000;103(7):1033-45. doi: 10.1016/s0092-8674(00)00207-5. PubMed PMID: 11163180.
